# Supplementary material for: Public availability of HIV-1 drug resistance sequence and treatment data: a systematic review
Source: PubMed Central journal article supplement — Lancet Microbe. Author manuscript; Available in PMC 2022 May 12. (PMC9095989; doi:10.1016/s2666-5247(21)00250-0), 2022-01-19
Supplement: NIHMS1787879-supplement-1.pdf [file NIHMS1787879-supplement-1.pdf]

# THE LANCET Microbe

## Supplementary appendix

This appendix formed part of the original submission and has been peer reviewed.  
We post it as supplied by the authors.

Supplement to: Rhee S-Y, Kassaye SG, Jordan MR, Kouamou V, Katzenstein D, Shafer RW.  
Public availability of HIV-1 drug resistance sequence and treatment data: a systematic  
review. *Lancet Microbe* 2022; published online Jan 19. [https://doi.org/10.1016/  
S2666-5247\(21\)00250-0](https://doi.org/10.1016/S2666-5247(21)00250-0).

## Appendix 1. Search terms and strategy

### PubMed search terms

Search conducted 2020-03-01:

HIV[Text Word] AND (pol[Text Word] OR protease[Text Word] OR RT[Text Word] OR "reverse transcriptase"[Text Word] OR integrase[Text Word]) AND (sequenc\*[Text Word] OR genotyp\*[Text Word]) AND (resistance[Text Word] OR resistant[Text Word]) NOT review[Publication Type] AND english[Language] AND ("2010"[Date - Publication] : "2019"[Date - Publication]).

### GenBank search strategy<sup>†</sup>

Search conducted 2020-05-01:

Step 1: Downloaded GenBank-format flat files of viral sequences (v. 237, released on 2020-04-15)  
Step 2: Conversion to BLAST searchable database using MAKEBLASTDB (in NCBI blast+ package)  
Step 3: TBLASTN (in NCBI blast+ package) search using HIV-1 group M *pol* consensus amino acid sequence  
Step 4: Sequences containing RT +/- protease +/- integrase and accompanying annotations retrieved  
Step 5: Search results grouped into submission sets containing the same "Title" and "Authors"

<sup>†</sup>The same procedure was used and described in the publications below:

Rhee S-Y, Shafer RW. Geographically-stratified HIV-1 group M *pol* subtype and circulating recombinant form sequences. *Sci. Data* 5:180148 doi: 10.1038/sdata.2018.148(2018)

Rhee, S-Y, Margeridon-Thermet S, Nguyen MH, Liu TF, Kagan RM, Beggle B, et al, Hepatitis B virus reverse transcriptase sequence variant database for sequence analysis and mutation discovery. *Antiviral Res.* (2010), doi:10.1016/j.antiviral.2010.09.012

## Appendix 2. Complete list of 934 studies meeting inclusion criteria

| PMID     | AuthorYr        | Trial name<br>(ClinicalTrials.gov Identifier) | Region                   | Median Sample Year | #Persons with sequences |          |                 |      | Availability |                  |
|----------|-----------------|-----------------------------------------------|--------------------------|--------------------|-------------------------|----------|-----------------|------|--------------|------------------|
|          |                 |                                               |                          |                    | Total                   | Children | ART/INSTI Naive | ART  | Seq          | Seq linked to Rx |
| 26529365 | Abdellaziz16    |                                               | Middle East/North Africa | 2013               | 152                     |          | 89              | 63   | GB           | NA               |
| 27412696 | Abdoel16        |                                               | Latin America/Caribbean  | 2009               | 100                     |          | 100             |      | GB           | Naive            |
| 31416460 | Abongwa19       |                                               | Sub-Saharan Africa       | 2016               | 81                      |          | 81              |      | GB           | Naive            |
| 25157501 | Acharya14       |                                               | Asia                     | 2013               | 206                     |          |                 | 206  | GB           | HIVDB            |
| 29126456 | Adawaye17       |                                               | Sub-Saharan Africa       | 2011               | 50                      |          |                 | 50   |              |                  |
| 22952625 | Afonso12        |                                               | Sub-Saharan Africa       | 2010               | 101                     |          | 101             |      | GB           | Naive            |
| 31024744 | Agapki19        |                                               | FSU                      | NA                 | 324                     |          | 324             |      |              |                  |
| 21860346 | Aghokeng11      |                                               | Sub-Saharan Africa       | 2007               | 206                     |          | 206             |      | GB           | Naive            |
| 23374858 | Aghokeng13      |                                               | Sub-Saharan Africa       | 2009               | 65                      |          |                 | 65   | GB           | Same Rx          |
| 24076968 | Aghokeng14      |                                               | Multiple                 | 2010               | 433                     |          |                 | 433  | GB           | NA               |
| 24248638 | Agyingi14       |                                               | Sub-Saharan Africa       | 2010               | 108                     |          | 93              | 15   | GB           | HIVDB            |
| 30648124 | Ahmed19         |                                               | Europe                   | NA                 | 1                       |          |                 | 1    |              |                  |
| 21568761 | Ajoge12         |                                               | Sub-Saharan Africa       | 2007               | 28                      |          | 28              |      | GB           | Naive            |
| 29884219 | Alaoui18        |                                               | Middle East/North Africa | 2014               | 77                      |          | 77              |      | GB           | Naive            |
| 31307042 | Alaoui19        |                                               | Middle East/North Africa | 2014               | 78                      |          | 78              |      | GB           | Naive            |
| 22877156 | Alcalde12       |                                               | Latin America/Caribbean  | 2007               | 293                     |          | 211             | 82   | GB           | NA               |
| 22317908 | Alcantara12     |                                               | Latin America/Caribbean  | 2009               | 83                      | 83       |                 |      | GB           | HIVDB            |
| 31242157 | Aleman-Campos18 |                                               | Latin America/Caribbean  | 2011               | 926                     |          | 342             | 584  |              |                  |
| 23507660 | Alencar13       |                                               | Latin America/Caribbean  | 2009               | 300                     |          | 300             |      | GB           | Naive            |
| 25652746 | Alexiev15       |                                               | Europe                   | 2011               | 305                     |          | 305             |      | GB           | Naive            |
| 27221346 | Alexiev17       |                                               | FSU                      | 2010               | 117                     |          | 99              | 18   | GB           | Naive            |
| 29091197 | Alidjinou17     |                                               | Europe                   | 2014               | 48                      |          | 48              |      |              |                  |
| 27798676 | Alvarez16       |                                               | Europe                   | 2013               | 38                      |          |                 | 38   | GB           | NA               |
| 31024510 | Alves19         |                                               | Latin America/Caribbean  | 2016               | 48                      |          | 27              | 48   | GB           | HIVDB            |
| 28591401 | Amaral17        |                                               | Latin America/Caribbean  | 2012               | 247                     |          | 118             | 129  | GB           | NA               |
| 23052354 | Ambrosioni12    |                                               | Europe                   | 2009               | 142                     |          | 142             |      |              |                  |
| 27624569 | Ambrosioni17    |                                               | Europe                   | 2016               | 36                      |          | 36              |      |              |                  |
| 31090546 | Ambrosioni19    |                                               | Europe                   | 2016               | 67                      |          | 67              |      |              |                  |
| 25114163 | Amiel14         |                                               | Europe                   | 2012               | 61                      |          |                 | 70   |              |                  |
| 26881451 | Amogne16        |                                               | Sub-Saharan Africa       | 2008               | 133                     |          | 133             |      | GB           | Naive            |
| 22933290 | An12            |                                               | Asia                     | 2009               | 39                      |          | 39              |      | GB           | Naive            |
| 29369826 | Andersson18     |                                               | Europe                   | 2013               | 1713                    |          | 1713            |      |              |                  |
| 28333295 | Andrade17       |                                               | Latin America/Caribbean  | 2012               | 117                     | 117      |                 |      |              |                  |
| 25397420 | Andrea14        |                                               | Europe                   | 2013               | 276                     |          | 276             |      |              |                  |
| 28732792 | Andreis17       |                                               | Europe                   | 2014               | 750                     |          | 750             |      |              |                  |
| 22519709 | Anquetil12      |                                               | Asia                     | 2010               | 79                      |          |                 | 79   | GB           | Same Rx          |
| 22842995 | Antal3          |                                               | Europe                   | NA                 | 1064                    |          |                 | 1064 |              |                  |
| 24059291 | Antoniadou14    |                                               | Europe                   | 2010               | 98                      |          | 98              |      | GB           | Naive            |
| 25559593 | Anworanich15    |                                               | Asia                     | 2011               | 120                     |          | 120             |      |              |                  |
| 21087198 | Anz11           |                                               | Middle East/North Africa | 2008               | 87                      |          | 87              |      | GB           | Naive            |
| 31076722 | Araujo19        |                                               | Europe                   | 2015               | 34                      |          | 34              |      | GB           | Naive            |
| 25116676 | Ariffin14       |                                               | Asia                     | 2012               | 26                      |          | 26              |      | GB           | Naive            |
| 30304061 | Arimide18       |                                               | Sub-Saharan Africa       | 2012               | 67                      |          | 67              |      | GB           | Naive            |
| 25712318 | Armenia15       |                                               | Europe                   | 2010               | 120                     |          |                 | 120  |              |                  |
| 20055590 | Arruda10        |                                               | Latin America/Caribbean  | 2008               | 76                      |          | 76              |      | GB           | Naive            |
| 20929346 | Arruda11        |                                               | Latin America/Caribbean  | 2008               | 74                      |          | 74              |      | GB           | Naive            |

|          |                   |                              |                          |      |      |     |      |     |       |         |
|----------|-------------------|------------------------------|--------------------------|------|------|-----|------|-----|-------|---------|
| 29504269 | Arruda18          |                              | Latin America/Caribbean  | 2015 | 1566 |     | 1566 |     | GB    | Naive   |
| 23404192 | Assoumou13        |                              | Europe                   | 2009 | 506  |     |      | 506 |       |         |
| 28333232 | Assoumou17        |                              | Europe                   | 2014 | 566  |     |      | 566 |       |         |
| 30517632 | Aulicino19        |                              | Latin America/Caribbean  | 2014 | 115  | 115 |      |     | GB    | Naive   |
| 20964489 | Avi11             |                              | Europe                   | 2008 | 145  |     | 145  |     | GB    | Naive   |
| 24025024 | Avi14             |                              | Europe                   | 2010 | 244  |     | 244  |     | GB    | Naive   |
| 23469241 | Avidor13          |                              | Middle East/North Africa | 2009 | 237  |     | 237  |     | GB    | Naive   |
| 22358416 | Avila-Rios11      |                              | Latin America/Caribbean  | 2010 | 145  |     | 145  |     |       |         |
| 22110765 | Avila-Rios11      |                              | Latin America/Caribbean  | 2008 | 1648 |     | 1648 |     | GB    | Naive   |
| 25347163 | Avila-Rios15      |                              | Latin America/Caribbean  | 2011 | 1084 |     | 1084 |     |       |         |
| 26558396 | Avila-Rios15      |                              | Latin America/Caribbean  | 2014 | 746  |     | 365  | 381 |       |         |
| 27658867 | Avila-Rios16      |                              | Latin America/Caribbean  | 2015 | 264  |     | 264  |     |       |         |
| 30597094 | Avila-Rios19      |                              | Latin America/Caribbean  | 2017 | 2006 |     | 2006 |     |       |         |
| 23888308 | Azam13            |                              | Asia                     | 2011 | 102  |     | 43   | 59  | GB    | NA      |
| 24423716 | Azam14            |                              | Asia                     | 2010 | 54   |     | 54   |     |       |         |
| 24142273 | Azam14            |                              | Asia                     | 2011 | 103  |     | 44   | 59  | GB    | HIVDB   |
| 25479241 | Bvrtolo14         |                              | Sub-Saharan Africa       | 2009 | 140  |     | 140  |     | GB    | Naive   |
| 28521719 | Babajide17        |                              | Sub-Saharan Africa       | 2012 | 35   |     |      | 35  |       |         |
| 24740443 | Baesi15           |                              | Middle East/North Africa | 2011 | 100  |     | 30   | 70  | GB    | NA      |
| 20950147 | Bansode11         |                              | Sub-Saharan Africa       | 2008 | 57   |     | 40   | 17  | GB    | NA      |
| 21995490 | Bansode11         |                              | Sub-Saharan Africa       | 2007 | 75   |     | 65   | 65  |       |         |
| 31273377 | Barabo19          |                              | Sub-Saharan Africa       | 2017 | 158  |     | 47   | 111 | GB    | NA      |
| 27875905 | Barral17          |                              | Latin America/Caribbean  | NA   | 210  |     | 105  | 105 | GB    | NA      |
| 23744572 | Barrow13          |                              | Latin America/Caribbean  | 2011 | 75   |     | 75   |     | HIVDB | Same Rx |
| 22297391 | Barth12           |                              | Europe                   | NA   | 26   |     | 23   | 26  |       |         |
| 23979153 | Bartlett13        |                              | North America            | NA   | 1    |     |      | 1   |       |         |
| 27458715 | Baudi17           |                              | Sub-Saharan Africa       | 2014 | 164  |     | 164  |     | GB    | Naive   |
| 25711326 | Baxter15          | START<br>(NCT00867048)       | Multiple                 | 2012 | 1946 |     | 1946 |     |       |         |
| 21857316 | Bermudez-Aza11    |                              | Latin America/Caribbean  | 2009 | 143  |     | 99   | 44  | GB    | NA      |
| 24813637 | Bertuccio14       |                              | Europe                   | NA   | 116  |     |      | 116 |       |         |
| 23455469 | Bessong13         |                              | Sub-Saharan Africa       | 2008 | 88   |     | 88   |     | GB    | Naive   |
| 22889300 | Betancor12        |                              | Europe                   | 2007 | 222  |     | 118  | 104 | GB    | NA      |
| 27697032 | Bhusal16          |                              | Asia                     | 2011 | 35   |     | 15   | 20  | GB    | HIVDB   |
| 23935858 | Bila13            |                              | Sub-Saharan Africa       | 2007 | 265  |     | 265  |     | GB    | Naive   |
| 23991142 | Billong13         |                              | Sub-Saharan Africa       | 2009 | 139  |     | 139  | 7   | GB    | HIVDB   |
| 24964358 | Blanco15          | SPIRAL<br>(NCT00528892)      | Europe                   | 2009 | 74   |     |      | 74  |       |         |
| 26240203 | Boender15         |                              | Sub-Saharan Africa       | 2008 | 2579 |     | 2579 |     | GB    | Naive   |
| 27402780 | Boender16         |                              | Sub-Saharan Africa       | NA   | 32   |     |      | 32  | GB    | Same Rx |
| 27342546 | Boender16         |                              | Sub-Saharan Africa       | 2008 | 119  | 56  |      | 63  | GB    | HIVDB   |
| 27836020 | Boerma16          |                              | Sub-Saharan Africa       | 2012 | 82   | 82  |      |     | GB    | Naive   |
| 26413848 | Boillot16         |                              | Sub-Saharan Africa       | 2011 | 55   |     |      | 55  | GB    | Same Rx |
| 23966745 | Bonney13          |                              | Sub-Saharan Africa       | 2008 | 60   |     | 60   |     |       |         |
| 25106410 | Bonora14          |                              | Europe                   | 2011 | 10   |     |      | 10  |       |         |
| 21620998 | Bontell12         |                              | Asia                     | 2008 | 63   |     | 63   |     | GB    | Naive   |
| 20707733 | Bonura10          |                              | Europe                   | 2008 | 109  |     | 109  |     | GB    | Naive   |
| 26424460 | Boyd15            | Second-Line<br>(NCT00931463) | Multiple                 | 2010 | 129  |     | 72   | 129 |       |         |
| 24091696 | Bracho14          |                              | Europe                   | 2009 | 41   |     | 41   |     | GB    | Naive   |
| 28494325 | Bradley-Stewart17 |                              | Europe                   | 2015 | 91   |     | 91   |     | GB    | Naive   |
| 21360548 | Brenner11         |                              | North America            | 2009 | 244  |     | 220  | 24  | GB    | NA      |
| 27029845 | Brenner16         |                              | North America            | 2015 | 2    |     |      | 2   | GB    | Same Rx |

|          |                          |                                |                          |      |      |    |      |      |       |         |
|----------|--------------------------|--------------------------------|--------------------------|------|------|----|------|------|-------|---------|
| 20950149 | Brigido11                |                                | Latin America/Caribbean  | 2007 | 1270 |    | 230  | 1040 | GB    | NA      |
| 27291892 | Brites16                 |                                | Latin America/Caribbean  | NA   | 1520 |    |      | 1520 |       |         |
| 24171696 | Brooks13                 |                                | North America            | 2009 | 274  |    | 274  |      | GB    | Naive   |
| 27231099 | Brooks16                 |                                | Sub-Saharan Africa       | 2013 | 35   |    |      | 35   | GB    | HIVDB   |
| 25970260 | Bruzzone15               |                                | Sub-Saharan Africa       | 2007 | 65   |    | 65   |      | GB    | Naive   |
| 26279669 | Budambula15              |                                | Sub-Saharan Africa       | 2012 | 121  |    | 53   | 68   | GB    | NA      |
| 30714528 | Budayanti18              |                                | Asia                     | 2009 | 47   |    | 30   | 17   | GB    | HIVDB   |
| 22024527 | Bunupuradah11            |                                | Asia                     | 2009 | 225  |    |      | 225  | HIVDB | HIVDB   |
| 25674767 | Bure15                   |                                | Asia                     | 2010 | 46   | 46 |      |      | GB    | NA      |
| 23830355 | Cahn13                   | Sailing<br>(NCT01231516)       | Multiple                 | 2012 | 19   |    |      | 19   |       |         |
| 28094565 | Calva17                  |                                | Latin America/Caribbean  | 2012 | 974  |    |      | 974  |       |         |
| 23186249 | Caplinskas13             |                                | FSU                      | 2008 | 27   |    | 27   |      | GB    | Naive   |
| 21732793 | Cardoso11                |                                | Latin America/Caribbean  | 2009 | 27   |    |      | 27   | GB    | NA      |
| 25397494 | Carganico14              |                                | Europe                   | 2013 | 1    |    |      | 1    |       |         |
| 22433277 | Caron12                  |                                | Sub-Saharan Africa       | 2008 | 107  |    | 107  |      | GB    | Naive   |
| 21417758 | Carvalho11               |                                | Latin America/Caribbean  | 2008 | 52   |    | 52   |      | GB    | Naive   |
| 25694526 | Carvalho15               |                                | Europe                   | 2008 | 289  |    | 289  |      | GB    | Naive   |
| 29077927 | Castagna18               |                                | Europe                   | 2010 | 12   |    |      | 16   |       |         |
| 20929349 | Castelbranco10           |                                | Sub-Saharan Africa       | 2008 | 35   |    | 35   |      | GB    | Naive   |
| 22358417 | Castillo11               |                                | Latin America/Caribbean  | 2009 | 72   | 25 | 47   |      |       |         |
| 22666853 | Cavalcanti12             |                                | Latin America/Caribbean  | 2008 | 108  |    | 108  |      |       |         |
| 25386009 | Cavalcanti15             |                                | Latin America/Caribbean  | 2012 | 92   |    |      | 92   | HIVDB | Same Rx |
| 26034768 | Cazave15                 |                                | Europe                   | 2013 | 5    |    |      | 5    |       |         |
| 22431019 | Ceccarelli12             |                                | Sub-Saharan Africa       | 2008 | 227  |    | 49   | 178  |       |         |
| 20817922 | Ceccherini-Silberstein10 |                                | Europe                   | NA   | 448  |    | 448  |      |       |         |
| 31037930 | Cecchini19               |                                | Latin America/Caribbean  | 2014 | 67   |    |      | 67   |       |         |
| 25518712 | Chabadova15              |                                | Europe                   | 2010 | 144  |    | 144  |      | GB    | Naive   |
| 28222757 | Chaillon17               |                                | Europe                   | 2012 | 342  |    | 342  |      | GB    | Naive   |
| 26572102 | Chakravarty15            |                                | Asia                     | 2013 | 16   |    |      | 16   | GB    | NA      |
| 22158948 | Chamberland12            |                                | Sub-Saharan Africa       | 2008 | 127  |    | 127  |      | GB    | Naive   |
| 20954831 | Chan11                   |                                | North America            | 2007 | 35   |    | 35   |      |       |         |
| 31535044 | Chan19                   |                                | North America            | 2010 | 206  |    | 206  |      |       |         |
| 27779200 | Chang16                  |                                | Asia                     | 2010 | 1370 |    | 1307 | 66   |       |         |
| 30601598 | Chang18                  |                                | Asia                     | 2012 | 178  |    | 178  |      | GB    | Naive   |
| 20964479 | Chaplin11                |                                | Sub-Saharan Africa       | 2007 | 338  |    |      | 338  | GB    | HIVDB   |
| 29084434 | Chaplin18                |                                | Sub-Saharan Africa       | 2013 | 788  |    |      | 788  | GB    | NA      |
| 20160635 | Charpentier10            |                                | Europe                   | 2008 | 91   |    | 91   |      |       |         |
| 20802293 | Charpentier10            | ANRS 139 TRIO<br>(NCT00460382) | Europe                   | 2007 | 14   |    |      | 14   | GB    | Same Rx |
| 21555827 | Charpentier11            |                                | Sub-Saharan Africa       | 2009 | 187  |    | 187  |      | GB    | Naive   |
| 20977359 | Charpentier11            |                                | Sub-Saharan Africa       | 2008 | 75   |    |      | 75   | GB    | NA      |
| 21599597 | Charpentier11            |                                | Sub-Saharan Africa       | 2010 | 69   | 69 |      |      | HIVDB | HIVDB   |
| 22155917 | Charpentier11            |                                | Sub-Saharan Africa       | 2009 | 77   | 77 |      |      |       |         |
| 23749952 | Charpentier13            |                                | Europe                   | 2007 | 9586 |    |      | 9586 |       |         |
| 25755001 | Charpentier15            | ANRS 139 TRIO<br>(NCT00460382) | Europe                   | 2008 | 80   |    |      | 80   |       |         |
| 29091218 | Charpentier17            |                                | Europe                   | NA   | 27   |    |      | 27   |       |         |
| 20704495 | Chaturbhuj10             |                                | Asia                     | 2007 | 34   |    | 34   |      | GB    | Naive   |
| 30937190 | Chauhan19                |                                | Asia                     | 2015 | 37   |    | 37   |      |       |         |
| 25976289 | Chehadeh15               |                                | Middle East/North Africa | 2013 | 30   |    | 30   |      | GB    | Naive   |
| 29212076 | Chehadeh17               |                                | Middle East/North Africa | 2016 | 53   |    | 53   |      | GB    | Naive   |
| 29506011 | Chehadeh18               |                                | Middle East/North Africa | 2014 | 42   |    |      | 42   | GB    | NA      |

|          |                |                                                      |                          |      |      |     |      |     |    |         |
|----------|----------------|------------------------------------------------------|--------------------------|------|------|-----|------|-----|----|---------|
| 30160141 | Chehadeh18     |                                                      | Middle East/North Africa | 2013 | 128  |     | 64   | 64  | GB | NA      |
| 23270497 | Chen12         |                                                      | Asia                     | 2010 | 299  |     | 299  |     | GB | Naive   |
| 23144953 | Chen12         |                                                      | Asia                     | 2009 | 157  |     | 63   | 94  | GB | NA      |
| 24489829 | Chen14         |                                                      | Asia                     | 2012 | 129  |     | 129  |     | GB | Naive   |
| 25207977 | Chen14         |                                                      | Asia                     | 2010 | 285  |     | 285  |     | GB | Naive   |
| 26895182 | Chen16         |                                                      | Asia                     | 2013 | 29   |     |      | 29  | GB | NA      |
| 27973597 | Chen16         |                                                      | Middle East/North Africa | 2014 | 36   |     | 36   |     | GB | Naive   |
| 27574950 | Chen17         |                                                      | Asia                     | 2013 | 31   |     | 31   |     | GB | Naive   |
| 28384058 | Chen17         | HPTN 061<br>(NCT00951249)                            | North America            | 2010 | 165  |     | 165  |     | GB | Naive   |
| 29698467 | Chen18         |                                                      | Asia                     | 2014 | 179  |     | 179  |     | GB | Naive   |
| 31018203 | Chen18         |                                                      | Asia                     | 2015 | 183  |     | 183  |     | GB | Naive   |
| 29534773 | Chen18         |                                                      | Asia                     | 2014 | 271  |     | 271  |     | GB | Naive   |
| 29892199 | Cheng18        |                                                      | Asia                     | 2013 | 71   |     |      | 71  |    |         |
| 26414430 | Cheriro15      |                                                      | Sub-Saharan Africa       | 2010 | 59   |     | 59   |     | GB | Naive   |
| 21806486 | Chibo11        |                                                      | Oceania                  | 2008 | 209  |     | 209  |     | GB | Naive   |
| 24522911 | Chikata14      |                                                      | Asia                     | 2009 | 363  |     | 363  |     | GB | Naive   |
| 29435471 | Chimbetete18   |                                                      | Sub-Saharan Africa       | NA   | 86   |     |      | 86  |    |         |
| 27894862 | Chimukangara17 |                                                      | Multiple                 | 2015 | 25   |     |      | 25  | GB | HIVDB   |
| 30430843 | Chimukangara19 |                                                      | Sub-Saharan Africa       | 2014 | 1845 |     | 1845 |     |    |         |
| 20156103 | Chin10         |                                                      | Asia                     | 2007 | 76   |     | 76   |     | GB | Naive   |
| 25826122 | Chin15         |                                                      | Asia                     | 2013 | 131  |     | 131  |     | GB | Naive   |
| 27109046 | Cho16          |                                                      | Asia                     | 2011 | 37   |     | 37   |     |    |         |
| 24680255 | Choi14         |                                                      | Asia                     | 2007 | 535  |     |      | 535 |    |         |
| 27575746 | Chow16         |                                                      | Sub-Saharan Africa       | 2013 | 154  |     | 154  |     | GB | Naive   |
| 27058353 | Chung16        |                                                      | Sub-Saharan Africa       | 2010 | 954  |     | 954  |     |    |         |
| 28859436 | Clutter17      |                                                      | North America            | 2010 | 61   |     | 61   |     | GB | Naive   |
| 30569276 | Coelho19       |                                                      | Latin America/Caribbean  | 2015 | 596  |     | 596  |     | GB | Naive   |
| 29244809 | Coetzee17      |                                                      | Sub-Saharan Africa       | 2016 | 119  |     | 95   | 24  | GB | NA      |
| 27802846 | Colby16        |                                                      | Asia                     | 2011 | 229  |     | 229  |     |    |         |
| 18650513 | Cooper8        | BENCHMARK-1<br>& -2<br>(NCT00293267;<br>NCT00293254) | Multiple                 | 2007 | 94   |     | 94   | 94  |    |         |
| 28301548 | Corado17       |                                                      | Latin America/Caribbean  | 2013 | 73   |     | 12   | 61  | GB | NA      |
| 29140932 | Corrigan18     |                                                      | Sub-Saharan Africa       | 2015 | 47   | 47  |      |     |    |         |
| 27345268 | Court16        |                                                      | Sub-Saharan Africa       | 2011 | 134  |     |      | 134 |    |         |
| 26681241 | Courtney16     |                                                      | Sub-Saharan Africa       | 2011 | 108  |     | 108  |     | GB | Naive   |
| 24798614 | Crawford14     |                                                      | Sub-Saharan Africa       | 2011 | 56   |     |      | 56  |    |         |
| 31498798 | Crispim19      |                                                      | Latin America/Caribbean  | 2015 | 227  |     | 227  |     | GB | Naive   |
| 26899538 | Crouzat16      |                                                      | North America            | 2009 | 143  |     | 143  |     |    |         |
| 28198788 | Crowell17      |                                                      | Sub-Saharan Africa       | 2011 | 120  | 120 |      |     |    |         |
| 27742812 | Cunningham17   |                                                      | Europe                   | 2012 | 442  |     | 442  |     | GB | Naive   |
| 28641707 | D'Costa17      |                                                      | Oceania                  | 2010 | 772  |     | 772  |     |    |         |
| 21482490 | d'Ettorre11    |                                                      | Europe                   | NA   | 40   |     |      | 40  |    |         |
| 21790471 | da12           |                                                      | Latin America/Caribbean  | 2008 | 49   |     | 49   |     | GB | Naive   |
| 23968204 | da13           |                                                      | Latin America/Caribbean  | 2011 | 87   |     | 87   |     | GB | Naive   |
| 27091699 | da16           |                                                      | Latin America/Caribbean  | 2011 | 305  |     |      | 305 | GB | NA      |
| 29925490 | Daar18         | GS-US-380-1878<br>(NCT02603107)                      | Multiple                 | 2016 | 7    |     |      | 7   |    |         |
| 21663632 | Dagnra11       |                                                      | Sub-Saharan Africa       | 2008 | 46   |     |      | 46  | GB | Same Rx |
| 27009561 | Darcissac16    |                                                      | Latin America/Caribbean  | 2009 | 304  |     | 304  |     | GB | Naive   |
| 26715861 | Davanos15      |                                                      | Europe                   | 2009 | 150  |     | 112  | 38  |    |         |

|          |               |                             |                          |      |      |    |      |      |       |         |
|----------|---------------|-----------------------------|--------------------------|------|------|----|------|------|-------|---------|
| 28986714 | Davarpah18    |                             | Middle East/North Africa | NA   | 59   |    | 29   | 30   |       |         |
| 30134298 | Davy-Mendez18 |                             | North America            | 2008 | 3682 |    |      | 3682 |       |         |
| 21871090 | de11          |                             | Europe                   | 2010 | 98   |    | 98   |      | GB    | Naive   |
| 25249214 | de14          |                             | Latin America/Caribbean  | 2009 | 329  |    | 329  |      |       |         |
| 24359837 | de14          |                             | Latin America/Caribbean  | 2011 | 69   |    |      | 69   |       |         |
| 24112468 | de14          |                             | North America            | 2011 | 47   | 47 |      |      | GB    | NA      |
| 29631420 | De18          |                             | Europe                   | 2014 | 341  |    | 48   | 179  |       |         |
| 21366425 | Dean11        |                             | Asia                     | 2008 | 92   |    | 92   |      | GB    | Naive   |
| 29149197 | deCamp17      | HVTN 505<br>(NCT00865566)   | North America            | 2012 | 47   |    | 47   |      | GB    | Naive   |
| 27392995 | Delatorre17   |                             | Latin America/Caribbean  | 2013 | 87   |    | 87   |      | GB    | Naive   |
| 28325060 | Delatorre17   |                             | Latin America/Caribbean  | 2014 | 140  |    |      | 140  | GB    | NA      |
| 26599410 | Delgado15     |                             | Europe                   | 2011 | 62   |    | 62   |      | GB    | Naive   |
| 22293432 | Delwart12     |                             | North America            | 2007 | 319  |    | 319  |      | GB    | Naive   |
| 30380053 | Derache19     |                             | Sub-Saharan Africa       | 2014 | 1287 |    | 1193 | 94   |       |         |
| 30321314 | Derache19     | ANRS 12249<br>(NCT01509508) | Sub-Saharan Africa       | 2014 | 1148 |    | 1148 |      | GB    | Naive   |
| 20334569 | Deshpande10   |                             | Asia                     | 2009 | 27   |    |      | 27   | GB    | Same Rx |
| 21453163 | Deshpande11   |                             | Asia                     | 2010 | 54   |    | 54   |      | GB    | Naive   |
| 20236364 | Di10          |                             | Europe                   | NA   | 5011 |    |      | 5011 |       |         |
| 22493752 | Diallo12      |                             | Latin America/Caribbean  | 2007 | 76   |    |      | 76   | GB    | NA      |
| 25582324 | Diallo15      |                             | Sub-Saharan Africa       | 2008 | 271  |    | 271  |      | GB    | Naive   |
| 26509441 | Diaz15        |                             | Latin America/Caribbean  | 2009 | 7491 |    |      | 7491 | GB    | NA      |
| 19665910 | DiazGrados10  |                             | Latin America/Caribbean  | NA   | 180  |    | 103  | 77   |       |         |
| 30535228 | Dimeglio19    |                             | Europe                   | NA   | 489  |    | 489  |      |       |         |
| 23620062 | Dimonte13     |                             | Europe                   | NA   | 335  |    | 335  |      |       |         |
| 27334566 | Dinesha16     |                             | Asia                     | 2014 | 167  |    |      | 167  | GB    | Same Rx |
| 24122937 | Diouara14     |                             | Sub-Saharan Africa       | 2008 | 52   |    |      | 52   | GB    | NA      |
| 25527333 | Diouara14     |                             | Sub-Saharan Africa       | 2011 | 70   |    |      | 70   | GB    | Same Rx |
| 20718620 | Djoko10       |                             | Sub-Saharan Africa       | 2008 | 41   |    | 41   |      | GB    | Naive   |
| 20954909 | Djoko11       |                             | Sub-Saharan Africa       | 2007 | 94   |    | 94   |      | GB    | Naive   |
| 23711895 | Dolling13     |                             | Europe                   | NA   | 322  |    |      | 322  |       |         |
| 30643108 | Dong19        |                             | Asia                     | 2013 | 5512 |    |      | 5512 |       |         |
| 26529282 | Dos16         |                             | Latin America/Caribbean  | 2014 | 97   |    | 97   |      | GB    | Naive   |
| 28797181 | Dow17         |                             | Sub-Saharan Africa       | 2013 | 65   | 65 |      |      | GB    | Naive   |
| 26311843 | Doyle15       |                             | Europe                   | 2011 | 788  |    | 533  | 255  | HIVDB | HIVDB   |
| 22544201 | Duc12         |                             | Asia                     | 2007 | 73   |    | 73   |      | HIVDB | Naive   |
| 29428459 | Dunn18        | PIVOT<br>(NCT01230580)      | Europe                   | 2008 | 3    |    |      | 3    |       |         |
| 20180140 | Dutta10       |                             | Asia                     | 2008 | 44   |    | 27   | 17   | GB    | NA      |
| 22585715 | Dvali12       |                             | North America            | 2007 | 153  |    | 126  | 27   | GB    | HIVDB   |
| 25879553 | Dvali15       |                             | North America            | 2009 | 193  |    |      | 193  |       |         |
| 31601544 | Eholie19      | ANRS 12269<br>(NCT02025868) | Sub-Saharan Africa       | 2014 | 175  |    |      | 175  |       |         |
| 25333961 | Ekici14       |                             | Multiple                 | 2007 | 192  |    | 192  |      |       |         |
| 21516199 | Ekstrand11    |                             | Asia                     | NA   | 92   |    |      | 92   |       |         |
| 21919803 | EI12          |                             | Middle East/North Africa | 2008 | 45   |    |      | 45   | GB    | NA      |
| 25397484 | EI14          |                             | Europe                   | NA   | 306  |    |      | 306  |       |         |
| 27402006 | EI16          |                             | Europe                   | 2009 | 36   |    |      | 36   |       |         |
| 27856703 | EI16          |                             | Europe                   | NA   | 386  |    |      | 386  |       |         |
| 20453629 | El-Khatib10   |                             | Sub-Saharan Africa       | 2008 | 139  |    |      | 139  | GB    | HIVDB   |
| 23044036 | Elmi12        |                             | Sub-Saharan Africa       | 2009 | 35   |    | 19   | 16   |       |         |
| 23225901 | Eron13        | VIKING<br>(NCT00950859)     | Multiple                 | 2011 | 9    |    |      | 9    |       |         |

|          |                     |                                  |                          |      |      |     |      |      |    |         |
|----------|---------------------|----------------------------------|--------------------------|------|------|-----|------|------|----|---------|
| 31279073 | Eron19              | EMERALD<br>(NCT02269917)         | Multiple                 | 2014 | 6    |     |      | 6    |    |         |
| 27353350 | Escoto-Delgadillo16 |                                  | Latin America/Caribbean  | 2011 | 124  |     | 124  |      | GB | Naive   |
| 28750647 | Etta17              |                                  | Sub-Saharan Africa       | 2014 | 35   |     |      | 35   |    |         |
| 26270824 | Fabeni15            |                                  | Europe                   | 2013 | 534  |     | 534  |      | GB | Naive   |
| 29091206 | Fabeni17            |                                  | Europe                   | 2010 | 4323 |     | 4323 |      |    |         |
| 24318486 | Fall-Malick14       |                                  | Sub-Saharan Africa       | 2010 | 65   |     |      | 65   | GB | NA      |
| 27974715 | Farrokhi16          |                                  | Middle East/North Africa | NA   | 78   |     | 28   | 50   |    |         |
| 29026792 | Farrokhi17          |                                  | Middle East/North Africa | 2014 | 29   |     |      | 29   | GB | NA      |
| 31143232 | Farrokhi19          |                                  | Middle East/North Africa | 2016 | 90   |     | 90   |      |    |         |
| 28575385 | Fearnhill17         |                                  | FSU                      | 2014 | 876  |     | 876  |      |    |         |
| 20156105 | Ferreira10          |                                  | Latin America/Caribbean  | 2007 | 41   | 41  |      |      | GB | Naive   |
| 21678433 | Ferreira11          |                                  | Latin America/Caribbean  | 2008 | 92   |     | 92   |      | GB | Naive   |
| 28539254 | Ferreira17          |                                  | Latin America/Caribbean  | 2014 | 43   |     | 43   |      |    |         |
| 28363087 | Filho17             |                                  | Latin America/Caribbean  | 2011 | 1300 |     |      | 1300 |    |         |
| 30058269 | Fily18              |                                  | Sub-Saharan Africa       | 2016 | 70   |     |      | 70   | GB | NA      |
| 20377427 | Fish10              |                                  | Sub-Saharan Africa       | 2009 | 73   |     | 73   |      | GB | Naive   |
| 25894830 | Flynn15             |                                  | North America            | NA   | 93   |     |      | 93   |    |         |
| 23833185 | Fofa13              |                                  | Europe                   | NA   | 267  |     | 267  |      |    |         |
| 24855120 | Fofa14              |                                  | Sub-Saharan Africa       | 2011 | 84   |     |      | 84   |    |         |
| 21460326 | Fogell11            | PEPI-Malawi<br>(NCT00115648)     | Sub-Saharan Africa       | 2007 | 37   | 37  |      |      | GB | Naive   |
| 21487249 | Fogell11            | PEPI-Malawi<br>(NCT00115648)     | Sub-Saharan Africa       | 2009 | 108  | 108 |      |      | GB | Naive   |
| 23249916 | Fogell13            | HPTN 046 (NCT<br>00074412)       | Sub-Saharan Africa       | 2011 | 38   | 38  |      |      | GB | Naive   |
| 21817951 | Fokam11             |                                  | Sub-Saharan Africa       | 2009 | 92   | 92  |      |      | GB | HIVDB   |
| 26602836 | Fokam16             |                                  | Sub-Saharan Africa       | 2014 | 53   |     | 53   |      | GB | Naive   |
| 22695298 | Fourati12           |                                  | Asia                     | 2011 | 601  |     |      | 601  | GB | NA      |
| 25558077 | Fourati15           |                                  | Europe                   | NA   | 502  |     |      | 502  |    |         |
| 25885327 | Frange15            |                                  | Europe                   | 2009 | 1318 |     | 1318 |      |    |         |
| 29846602 | Frange18            |                                  | Europe                   | 2011 | 84   | 84  |      |      |    |         |
| 25037229 | Franzetti14         |                                  | Europe                   | 2008 | 5246 |     |      | 5246 |    |         |
| 23551870 | Frentz13            |                                  | Europe                   | 2007 | 1630 |     | 1630 |      | GB | Naive   |
| 29933437 | Fulcher18           |                                  | North America            | NA   | 1    |     |      | 1    |    |         |
| 21260991 | Gafarova10          |                                  | FSU                      | 2007 | 43   |     | 43   |      | GB | Same Rx |
| 29977967 | Gagliardini18       |                                  | Europe                   | NA   | 8    |     |      | 8    |    |         |
| 28867497 | Gallant17           | GS-US-380-1489<br>(NCT02607930)  | Multiple                 | 2015 | 5    |     |      | 5    |    |         |
| 21326075 | Gallien11           | ANRS 138-Easier<br>(NCT00454337) | Europe                   | 2008 | 39   |     |      | 39   |    |         |
| 25397497 | Garcia-Diaz14       |                                  | Europe                   | NA   | 107  |     | 107  |      |    |         |
| 28961972 | Garcia-Morales17    |                                  | Latin America/Caribbean  | 2012 | 1947 |     | 1947 |      |    |         |
| 20007331 | Garrido10           |                                  | Europe                   | 2007 | 418  |     | 418  |      | GB | Naive   |
| 21439330 | Garrido11           |                                  | Europe                   | 2008 | 638  |     | 535  | 103  |    |         |
| 22450969 | Garrido12           |                                  | Europe                   | 2009 | 61   |     | 21   | 40   | GB | HIVDB   |
| 21457126 | Garrido12           |                                  | Europe                   | 2008 | 89   |     |      | 89   | GB | Same Rx |
| 25738513 | Gashnikova15        |                                  | FSU                      | 2014 | 46   |     | 46   |      | GB | Naive   |
| 27957489 | Gashnikova16        |                                  | FSU                      | 2015 | 71   |     | 71   |      | GB | Naive   |
| 27761744 | Gashnikova17        |                                  | FSU                      | 2015 | 50   |     | 50   |      | GB | Naive   |
| 22850992 | Gaspareto12         |                                  | Latin America/Caribbean  | 2009 | 49   |     | 49   |      | GB | Naive   |
| 25397540 | Gazaignes14         |                                  | Europe                   | 2012 | 7    |     |      | 7    |    |         |
| 26566057 | Gazaignes16         |                                  | Europe                   | 2012 | 9    |     |      | 9    |    |         |
| 24284781 | Geretti14           |                                  | Multiple                 | 2009 | 193  |     | 193  |      |    |         |



|          |                     |                         |                          |      |      |    |     |      |       |         |       |
|----------|---------------------|-------------------------|--------------------------|------|------|----|-----|------|-------|---------|-------|
| 19933171 | Germaud10           |                         | Sub-Saharan Africa       | 2007 | 30   | 30 |     |      | HIVDB | Same Rx |       |
| 28589513 | Ghafari17           |                         | Middle East/North Africa | 2013 | 52   |    | 52  |      | GB    | Naive   |       |
| 21632754 | Gianella11          |                         | North America            | NA   | 32   |    | 32  |      |       |         |       |
| 29202874 | Gibson17            |                         | Sub-Saharan Africa       | NA   | 262  |    |     | 262  |       |         |       |
| 31751433 | Gill19              |                         | Asia                     | 2014 | 61   |    |     | 61   |       |         |       |
| 20166821 | Gingelmaier10       |                         | Europe                   | 2007 | 40   |    |     | 40   |       |         |       |
| 27279571 | Girard17            | PROTEA<br>(NCT01448707) | Europe                   | 2014 | 3    |    |     | 3    |       |         |       |
| 31860167 | Giron-Callejas19    |                         | Sub-Saharan Africa       | 2016 | 638  |    | 171 | 467  |       |         |       |
| 21457055 | Goldsamt11          |                         | North America            | 2007 | 347  |    | 31  | 316  | GB    | NA      |       |
| 28795954 | Golmohammadi17      |                         | Middle East/North Africa | 2013 | 122  |    |     | 122  |       |         |       |
| 21037251 | Gonzalez11          |                         | Europe                   | 2007 | 56   |    |     | 56   |       |         |       |
| 29309418 | Gonzalez-Domenech18 |                         | Europe                   | 2016 | 57   |    |     | 57   | GB    | Naive   |       |
| 21157296 | Goodman11           |                         | North America            | NA   | 476  |    |     | 476  |       |         |       |
| 30695102 | Gopalan19           |                         | Asia                     | 2012 | 97   | 97 |     |      | GB    | NA      |       |
| 21622023 | Graf11              |                         | Latin America/Caribbean  | 2008 | 82   |    |     | 82   | GB    | Naive   |       |
| 21819257 | Green11             |                         | Sub-Saharan Africa       | 2008 | 94   | 94 |     |      | GB    | HIVDB   |       |
| 22906365 | Grgic13             |                         | Europe                   | 2007 | 119  |    |     | 119  | GB    | Naive   |       |
| 27342228 | Guichet16           | 2LADY<br>(NCT00928187)  | Sub-Saharan Africa       | 2011 | 446  |    |     | 446  | GB    | Same Rx |       |
| 25826640 | Guimaraes15         |                         | Latin America/Caribbean  | 2013 | 217  |    |     | 217  | GB    | Naive   |       |
| 25879488 | Guo15               |                         | Asia                     | 2010 | 130  |    |     | 130  | GB    | Naive   |       |
| 28407682 | Guo17               |                         | Asia                     | 2015 | 93   |    |     | 93   |       |         |       |
| 25256391 | Gupta14             | CASTLE<br>(NCT00272779) | Multiple                 | 2007 | 204  |    |     | 204  |       |         |       |
| 23372110 | Gutierrez13         |                         | Europe                   | 2008 | 83   |    |     | 83   |       |         |       |
| 25956162 | Hachiya15           |                         | Asia                     | 2013 | 577  |    |     | 531  | 46    | GB      | HIVDB |
| 20146734 | Haidara10           |                         | Sub-Saharan Africa       | 2007 | 101  |    |     | 101  |       |         |       |
| 20585262 | Hamers10            |                         | Sub-Saharan Africa       | 2008 | 548  |    |     | 548  | GB    | Naive   |       |
| 21802367 | Hamers11            |                         | Sub-Saharan Africa       | 2008 | 2474 |    |     | 2474 | GB    | Naive   |       |
| 22474222 | Hamers12            |                         | Sub-Saharan Africa       | 2009 | 149  |    |     | 149  | GB    | HIVDB   |       |
| 22049946 | Hamilton12          |                         | Latin America/Caribbean  | 2009 | 92   |    |     | 71   | 21    | GB      | NA    |
| 20610954 | Hamkar10            |                         | Middle East/North Africa | 2009 | 42   |    |     | 42   | GB    | NA      |       |
| 20104106 | Han10               |                         | Asia                     | 2007 | 84   |    |     | 84   | GB    | Naive   |       |
| 26018591 | Han15               |                         | Asia                     | 2010 | 30   |    |     | 20   | 9     | GB      | NA    |
| 30944175 | Hanke19             |                         | Europe                   | 2013 | 183  |    |     | 183  | GB    | Naive   |       |
| 28325065 | Hao17               |                         | Asia                     | 2015 | 237  |    |     | 237  | GB    | Naive   |       |
| 25281399 | Hardy15             |                         | North America            | 2011 | 1    |    |     | 1    |       |         |       |
| 22900472 | Hassan13            |                         | Sub-Saharan Africa       | 2008 | 211  |    |     | 211  | GB    | Naive   |       |
| 24456757 | Hassan14            |                         | Sub-Saharan Africa       | 2010 | 55   |    |     | 55   | GB    | Same Rx |       |
| 30562356 | Hassan18            |                         | Sub-Saharan Africa       | 2010 | 97   |    |     | 97   | GB    | Naive   |       |
| 30759103 | Hassan19            |                         | Sub-Saharan Africa       | 2009 | 50   |    |     | 50   | 9     | GB      | NA    |
| 20300008 | Hatano10            |                         | North America            | 2007 | 29   |    |     | 29   | GB    | HIVDB   |       |
| 20692295 | Hattori10           |                         | Asia                     | 2007 | 1934 |    |     | 1934 | GB    | Naive   |       |
| 26428230 | Hattori16           |                         | Asia                     | 2010 | 2205 |    |     | 2205 | GB    | Naive   |       |
| 26469189 | Hauser15            |                         | Sub-Saharan Africa       | 2008 | 30   |    |     | 30   |       |         |       |
| 28105988 | Hauser17            |                         | Europe                   | 2013 | 809  |    |     | 809  |       |         |       |
| 30408827 | Hauser18            |                         | Europe                   | 2014 | 1885 |    |     | 1885 | GB    | Naive   |       |
| 27076106 | Hawkins16           | TOV3<br>(NCT00383669)   | Sub-Saharan Africa       | 2007 | 149  |    |     | 43   | 106   | GB      | NA    |
| 27330069 | Hayashida16         |                         | Asia                     | 2013 | 6    |    |     | 6    |       |         |       |
| 29620931 | Herndez-Sanchez18   |                         | Latin America/Caribbean  | 2013 | 51   |    |     | 51   |       | GB      | Naive |
| 21185530 | Hightow-Weidman11   |                         | North America            | 2007 | 145  |    |     | 145  |       |         |       |

|          |               |                        |                          |      |      |      |      |     |       |         |
|----------|---------------|------------------------|--------------------------|------|------|------|------|-----|-------|---------|
| 27468776 | Hobbs15       |                        | Oceania                  | 2009 | 210  |      | 210  |     |       |         |
| 24789308 | Hodcroft14    |                        | Europe                   | NA   | 8483 |      | 8483 |     | GB    | Naive   |
| 26967154 | Hoenigl16     |                        | Europe                   | 2011 | 259  |      | 259  |     | GB    | Naive   |
| 23751421 | Hoffmann13    |                        | Sub-Saharan Africa       | 2010 | 40   |      |      | 40  | GB    | Same Rx |
| 28329390 | Hofstra17     |                        | Latin America/Caribbean  | 2012 | 104  |      | 104  |     |       |         |
| 21326132 | Holguin11     |                        | Latin America/Caribbean  | 2010 | 80   | 80   |      |     | GB    | NA      |
| 23782115 | Holguin13     |                        | Latin America/Caribbean  | 2010 | 88   |      | 88   |     | GB    | Naive   |
| 25564107 | Hong15        |                        | Sub-Saharan Africa       | 2009 | 398  |      | 384  | 14  |       |         |
| 26077516 | Hou15         |                        | Asia                     | 2012 | 419  |      | 106  | 313 |       |         |
| 22096044 | Hsieh11       |                        | Asia                     | 2007 | 53   |      |      | 53  |       |         |
| 24831493 | Hua15         |                        | Asia                     | 2009 | 447  |      | 447  |     |       |         |
| 21840743 | Huaman11      |                        | North America            | 2007 | 133  |      | 133  |     |       |         |
| 21770741 | Hue11         |                        | Sub-Saharan Africa       | 2008 | 153  |      | 121  | 32  | GB    | HIVDB   |
| 31125356 | Huik19        |                        | Europe                   | 2013 | 209  |      | 209  |     | GB    | Naive   |
| 22544199 | Hunt12        |                        | Sub-Saharan Africa       | 2008 | 345  |      | 345  |     | GB    | Naive   |
| 28981637 | Hunt17        |                        | Sub-Saharan Africa       | 2013 | 115  |      |      | 115 | HIVDB | HIVDB   |
| 31526373 | Hunt19        |                        | Sub-Saharan Africa       | 2011 | 220  | 220  |      |     | GB    | Naive   |
| 25649964 | Huruy15       |                        | Sub-Saharan Africa       | 2010 | 83   |      | 83   |     | GB    | Naive   |
| 30286160 | Huruy18       |                        | Sub-Saharan Africa       | 2010 | 41   |      | 41   |     | GB    | Naive   |
| 29264355 | Ikomey17      |                        | Sub-Saharan Africa       | 2015 | 55   | 55   |      |     |       |         |
| 24164431 | Imade14       |                        | Sub-Saharan Africa       | 2011 | 34   |      | 34   |     | GB    | Naive   |
| 29732988 | Indriati18    |                        | Asia                     | 2014 | 60   |      | 7    | 53  | GB    | NA      |
| 29462322 | Inzaule18     |                        | Sub-Saharan Africa       | 2008 | 425  |      | 425  |     | GB    | Naive   |
| 28961680 | Inzaule18     |                        | Sub-Saharan Africa       | 2014 | 430  | 430  |      |     | GB    | Naive   |
| 30560686 | Irias19       |                        | Latin America/Caribbean  | 2016 | 41   |      | 41   |     | GB    | Naive   |
| 22189822 | Iweriebor12   |                        | Sub-Saharan Africa       | 2007 | 47   |      | 47   |     | GB    | Naive   |
| 24609015 | Jacobs14      |                        | Sub-Saharan Africa       | 2009 | 84   |      | 58   | 26  | GB    | NA      |
| 28088769 | Jaffre17      |                        | Europe                   | 2014 | 92   |      | 92   |     |       |         |
| 29244859 | Jagdagsuren17 |                        | Asia                     | 2014 | 123  |      | 123  |     | GB    | Naive   |
| 23626742 | Jahanbakhsh13 |                        | Middle East/North Africa | 2010 | 47   |      | 47   |     | GB    | Naive   |
| 20085464 | Jakobsen10    |                        | Europe                   | 2009 | 61   |      | 61   |     |       |         |
| 20844809 | Jamjoom10     |                        | Middle East/North Africa | 2007 | 63   |      |      | 63  |       |         |
| 30229661 | Jeong19       |                        | Asia                     | 2016 | 99   |      | 58   | 9   | GB    | NA      |
| 30044302 | Jespersen18   | PIONA<br>(NCT01192035) | Sub-Saharan Africa       | 2012 | 56   |      |      | 56  | GB    | NA      |
| 25006240 | Jeulin14      |                        | Europe                   | 2012 | 238  |      | 127  | 111 |       |         |
| 20174661 | Ji10          |                        | North America            | NA   | 96   |      | 96   |     |       |         |
| 21900719 | Ji11          |                        | Latin America/Caribbean  | NA   | 48   |      | 48   |     |       |         |
| 31228958 | Jia19         |                        | Asia                     | 2015 | 409  |      | 409  |     | GB    | Naive   |
| 25141905 | Jiamsakul14   |                        | Asia                     | 2009 | 105  |      |      | 105 | GB    | HIVDB   |
| 25685169 | Jiamsakul15   |                        | Asia                     | 2008 | 28   |      | 28   |     | GB    | Naive   |
| 21041915 | Johannessen10 |                        | Sub-Saharan Africa       | 2007 | 34   |      |      | 34  |       |         |
| 21115444 | Johannessen11 |                        | Sub-Saharan Africa       | NA   | 36   |      |      | 36  |       |         |
| 23943851 | Johnston14    |                        | Sub-Saharan Africa       | 2008 | 127  |      |      | 127 | GB    | NA      |
| 29020335 | Jordan17      |                        | Sub-Saharan Africa       | 2012 | 1450 | 1450 |      |     |       |         |
| 20578518 | Jullaksorn10  |                        | Asia                     | 2008 | 39   |      | 17   | 22  | GB    | NA      |
| 26700639 | Kaleebu15     |                        | Sub-Saharan Africa       | 2012 | 474  |      | 425  | 35  | HIVDB | HIVDB   |
| 20350879 | Kanizsai10    |                        | Europe                   | NA   | 56   |      | 56   |     |       |         |
| 26296335 | Kanngai15     |                        | Asia                     | 2012 | 127  |      | 127  |     | GB    | Naive   |
| 30134290 | Kantor18      |                        | Sub-Saharan Africa       | 2011 | 105  |      |      | 105 |       |         |
| 21235402 | Kao11         |                        | Asia                     | 2009 | 381  |      | 381  |     | GB    | Naive   |

|          |                   |                                 |                          |      |      |     |      |     |    |         |
|----------|-------------------|---------------------------------|--------------------------|------|------|-----|------|-----|----|---------|
| 26573132 | Karade16          |                                 | Asia                     | 2014 | 52   |     | 52   |     | GB | Naive   |
| 27631260 | Karade16          |                                 | Asia                     | 2014 | 80   |     |      | 80  | GB | NA      |
| 28763465 | Karade17          |                                 | Asia                     | 2016 | 75   |     |      | 75  | GB | NA      |
| 30793915 | Karade19          |                                 | Asia                     | 2018 | 58   |     | 58   |     | GB | Naive   |
| 29587492 | Karamov18         |                                 | FSU                      | 2015 | 62   |     | 62   |     | GB | Naive   |
| 29905958 | Karkashadze19     |                                 | Europe                   | 2015 | 120  |     |      | 447 | GB | NA      |
| 22448246 | Karlsson12        |                                 | Europe                   | 2007 | 208  |     | 208  |     | GB | Naive   |
| 21886779 | Kasang11          |                                 | Sub-Saharan Africa       | 2008 | 86   |     | 86   |     | GB | Naive   |
| 27287235 | Katlama16         |                                 | Europe                   | 2014 | 3    |     |      | 3   |    |         |
| 24773167 | Kazenova15        |                                 | FSU                      | 2011 | 201  |     | 152  | 56  | GB | NA      |
| 28443684 | Kazenova17        |                                 | FSU                      | 2014 | 143  |     | 143  |     | GB | Naive   |
| 22860571 | Kebe13            |                                 | Sub-Saharan Africa       | 2009 | 52   | 52  |      |     | GB | Same Rx |
| 24439027 | Kebe14            |                                 | Sub-Saharan Africa       | NA   | 25   | 25  |      |     |    |         |
| 25348045 | Khairunisa15      |                                 | Asia                     | 2014 | 66   |     |      | 66  | GB | Same Rx |
| 29589465 | Khairunisa18      |                                 | Asia                     | 2017 | 43   |     |      | 43  | GB | NA      |
| 31117863 | Khan19            |                                 | Asia                     | 2014 | 50   |     |      | 50  |    |         |
| 26828876 | Kiertiburakul16   |                                 | Asia                     | 2015 | 265  |     | 265  |     | GB | Naive   |
| 23826076 | Kiertiburanakul13 |                                 | Asia                     | 2009 | 1798 |     | 1798 |     | GB | Naive   |
| 20946407 | Kim11             |                                 | Asia                     | 2007 | 75   |     | 75   |     | GB | Naive   |
| 23952717 | Kim13             |                                 | Asia                     | 2011 | 84   |     | 50   | 34  | GB | HIVDB   |
| 29915524 | Kim18             |                                 | Asia                     | 2014 | 106  |     | 106  |     |    |         |
| 30305354 | Kinloch19         |                                 | Sub-Saharan Africa       | 2015 | 341  |     | 341  |     | GB | Naive   |
| 30061964 | Kinyua18          |                                 | Sub-Saharan Africa       | 2012 | 382  |     |      | 190 | GB | NA      |
| 26723018 | Kityo16           |                                 | Sub-Saharan Africa       | 2010 | 330  | 279 |      |     | GB | Naive   |
| 28129253 | Kityo17           | EARNEST<br>(NCT00988039)        | Sub-Saharan Africa       | 2011 | 787  |     |      | 787 | GB | NA      |
| 28673027 | Kityo17           |                                 | Sub-Saharan Africa       | 2010 | 278  | 278 |      |     | GB | NA      |
| 30513108 | Kityo18           | REALITY<br>(NCT01825031)        | Sub-Saharan Africa       | 2014 | 120  |     | 87   | 120 |    |         |
| 27999036 | Kletenkov17       |                                 | Europe                   | 2008 | 515  |     |      | 515 |    |         |
| 24473489 | Kleyn14           |                                 | North America            | 2009 | 428  |     | 428  |     |    |         |
| 25487529 | Koigi14           |                                 | Sub-Saharan Africa       | 2013 | 60   |     |      | 60  | GB | NA      |
| 25259833 | Kolomeets14       |                                 | FSU                      | 2012 | 193  |     |      | 193 | GB | HIVDB   |
| 23365432 | Kondo13           |                                 | Asia                     | 2007 | 477  |     | 477  |     | GB | Naive   |
| 26617663 | Konou15           |                                 | Sub-Saharan Africa       | 2012 | 67   |     |      | 65  | GB | NA      |
| 26558549 | Konou15           |                                 | Sub-Saharan Africa       | 2012 | 173  |     |      | 173 | GB | NA      |
| 27235597 | Konou16           |                                 | Sub-Saharan Africa       | 2013 | 79   |     | 79   |     | GB | Naive   |
| 29684083 | Kostrikis18       |                                 | Europe                   | 2011 | 100  |     | 82   | 18  | GB | NA      |
| 24328535 | Kotaki14          |                                 | Asia                     | 2012 | 43   |     | 43   |     | GB | Naive   |
| 28561075 | Kotaki15          |                                 | Asia                     | 2013 | 58   |     | 58   |     | GB | Naive   |
| 31361272 | Kouamou19         |                                 | Sub-Saharan Africa       | 2017 | 159  |     |      | 159 | GB | HIVDB   |
| 26137563 | Kouri15           |                                 | Latin America/Caribbean  | 2008 | 92   |     | 92   |     | GB | Naive   |
| 21453134 | Kousiappa11       |                                 | Europe                   | 2008 | 74   |     | 74   |     | GB | Naive   |
| 21900725 | Kozall11          |                                 | Middle East/North Africa | NA   | 411  |     | 411  |     |    |         |
| 30096068 | Kroon18           |                                 | Asia                     | 2014 | 439  |     | 439  |     | GB | Naive   |
| 24785949 | Kuhn14            |                                 | Sub-Saharan Africa       | 2011 | 230  | 230 |      |     | GB | Naive   |
| 25350960 | Kulkarni14        | GS-US-236-0103<br>(NCT01106586) | Multiple                 | 2010 | 708  |     | 708  | 40  |    |         |
| 28891788 | Kulkarni17        | WAVES<br>(NCT01705574)          | Multiple                 | 2014 | 575  |     | 575  | 39  |    |         |
| 24387706 | Kumar14           |                                 | Asia                     | 2010 | 27   | 27  |      |     | GB | Naive   |
| 25845390 | Lagal5            |                                 | FSU                      | 2009 | 78   |     | 67   | 11  | GB | HIVDB   |
| 26404079 | Lai16             |                                 | Asia                     | 2010 | 440  |     | 440  |     |    |         |

|          |                  |                                      |                         |      |      |    |      |      |       |       |
|----------|------------------|--------------------------------------|-------------------------|------|------|----|------|------|-------|-------|
| 27033350 | Lakhikumar16     |                                      | Asia                    | 2012 | 110  |    |      | 110  |       |       |
| 27346600 | Lam16            | Second-Line<br>(NCT00931463)         | Multiple                | 2011 | 491  |    |      | 491  | GB    | HIVDB |
| 22396434 | Lambert-Niclot12 | Monoi<br>(NCT00421551)               | Europe                  | 2009 | 9    |    |      | 9    |       |       |
| 22733652 | Lambert-Niclot12 |                                      | Europe                  | 2008 | 72   |    |      | 72   |       |       |
| 23361642 | Lambert-Niclot13 |                                      | Europe                  | 2009 | 1729 |    | 1729 |      |       |       |
| 24302653 | Lambert-Niclot14 |                                      | Europe                  | 2010 | 4731 |    |      | 4731 |       |       |
| 26702926 | Lambert-Niclot16 | NEAT<br>001/ANRS143<br>(NCT01066962) | Europe                  | 2011 | 110  |    | 110  | 110  |       |       |
| 24873898 | Lapovok14        |                                      | Asia                    | 2012 | 166  |    | 166  |      | GB    | Naive |
| 28814231 | Lapovok17        |                                      | FSU                     | 2009 | 502  |    | 275  |      | GB    | Naive |
| 22355307 | Lataillade12     | CASTLE<br>(NCT00272779)              | Multiple                | 2007 | 36   |    |      | 36   |       |       |
| 21311113 | Lathouwers11     | Artemis<br>(NCT00258557)             | Multiple                | 2007 | 689  |    | 689  | 77   |       |       |
| 23558157 | Lathouwers13     | ODIN<br>(NCT00524368)                | Multiple                | 2009 | 102  |    |      | 102  |       |       |
| 28146591 | Lavu17           |                                      | Oceania                 | 2013 | 122  |    | 122  |      | GB    | Naive |
| 22039450 | Lazaro11         |                                      | Asia                    | 2008 | 105  |    | 105  |      | GB    | Naive |
| 22431018 | Le12             |                                      | Asia                    | 2009 | 126  |    | 104  | 22   |       |       |
| 30863382 | Lebedev19        |                                      | FSU                     | 2014 | 896  |    |      | 896  | GB    | NA    |
| 30793914 | Ledwaba19        |                                      | Sub-Saharan Africa      | 2007 | 2225 |    | 1109 | 257  | GB    | NA    |
| 24960249 | Lee14            |                                      | Sub-Saharan Africa      | 2007 | 572  |    | 572  |      | GB    | Naive |
| 25171915 | Lel14            |                                      | Sub-Saharan Africa      | 2011 | 53   | 53 |      |      | GB    | Naive |
| 25285539 | Lennox14         | ACTG A5257<br>(NCT 00811954)         | North America           | 2009 | 295  |    | 294  | 239  | HIVDB | HIVDB |
| 28375875 | Lepik17          |                                      | North America           | 2015 | 14   |    |      | 14   |       |       |
| 22427821 | Levison12        |                                      | Sub-Saharan Africa      | 2007 | 33   |    |      | 33   |       |       |
| 23144802 | Li12             |                                      | Asia                    | 2007 | 451  |    | 97   | 354  | GB    | NA    |
| 23121221 | Li13             |                                      | Asia                    | 2009 | 76   |    | 76   |      | GB    | Naive |
| 23341369 | Li13             |                                      | Asia                    | 2009 | 211  |    | 211  |      | GB    | Naive |
| 24098398 | Li13             |                                      | Asia                    | 2009 | 1159 |    | 1159 |      |       |       |
| 23788482 | Li13             |                                      | Asia                    | NA   | 803  |    | 542  | 261  |       |       |
| 24009694 | Li13             |                                      | Asia                    | 2010 | 609  |    | 94   | 515  |       |       |
| 23800338 | Li14             |                                      | Asia                    | 2009 | 98   |    | 98   |      | GB    | Naive |
| 24994115 | Li14             |                                      | Asia                    | 2012 | 216  |    | 216  |      |       |       |
| 25560398 | Li15             |                                      | Asia                    | 2009 | 284  |    | 284  |      | GB    | Naive |
| 25501612 | Li15             |                                      | Asia                    | 2009 | 444  |    | 444  |      |       |       |
| 26577039 | Li15             |                                      | Asia                    | 2010 | 1205 |    | 1205 |      | GB    | Naive |
| 26121491 | Li15             |                                      | Asia                    | 2012 | 1265 |    | 1265 |      | GB    | Naive |
| 26381060 | Li16             |                                      | Asia                    | 2009 | 118  |    | 118  |      | GB    | Naive |
| 27698457 | Li16             |                                      | Asia                    | 2011 | 1152 |    | 1152 |      |       |       |
| 27782811 | Li16             |                                      | Asia                    | 2009 | 478  |    | 478  |      | GB    | Naive |
| 26990626 | Li16             |                                      | North America           | 2010 | 1070 |    | 1070 |      |       |       |
| 28795354 | Li17             |                                      | Asia                    | 2015 | 120  |    | 100  | 20   | GB    | HIVDB |
| 30150680 | Li18             |                                      | Asia                    | 2013 | 229  |    | 229  |      | GB    | Naive |
| 30621727 | Li19             |                                      | Asia                    | 2012 | 88   |    |      | 88   |       |       |
| 26108001 | Librelotto16     |                                      | Latin America/Caribbean | 2011 | 149  |    | 40   | 109  | GB    | NA    |
| 27037910 | Lima16           |                                      | Latin America/Caribbean | 2010 | 95   |    | 95   |      | GB    | Naive |
| 27218259 | Lima16           |                                      | Latin America/Caribbean | 2008 | 167  |    | 167  |      | GB    | Naive |
| 27381205 | Lima16           |                                      | Latin America/Caribbean | 2009 | 192  |    | 96   | 96   | GB    | NA    |
| 29373694 | Lima18           |                                      | Latin America/Caribbean | 2010 | 651  |    |      | 651  |       |       |
| 26038447 | Lin13            |                                      | Asia                    | 2011 | 122  |    | 122  |      | GB    | Naive |

|          |                |                                                                     |                         |      |      |     |      |     |       |         |
|----------|----------------|---------------------------------------------------------------------|-------------------------|------|------|-----|------|-----|-------|---------|
| 31491787 | Liu19          |                                                                     | Asia                    | 2016 | 358  |     | 358  |     |       |         |
| 22719231 | Lockman12      | OCTANE A5208<br>(NCT00089505)                                       | Sub-Saharan Africa      | 2007 | 38   |     |      | 38  | HIVDB | HIVDB   |
| 26543866 | Lopes15        |                                                                     | Latin America/Caribbean | 2009 | 377  |     |      | 377 |       |         |
| 26703695 | Lopez16        |                                                                     | North America           | 2007 | 945  |     |      | 945 | GB    | NA      |
| 26872331 | Lopez-Cortes16 |                                                                     | Europe                  | 2011 | 158  |     |      | 158 |       |         |
| 24946849 | Loubet14       |                                                                     | Sub-Saharan Africa      | 2013 | 211  |     | 211  |     | GB    | Naive   |
| 25698771 | Loubet15       |                                                                     | Sub-Saharan Africa      | 2013 | 66   |     |      | 66  |       |         |
| 30640198 | Louis19        |                                                                     | Latin America/Caribbean | 2013 | 304  | 304 |      |     |       |         |
| 26200883 | Lu15           |                                                                     | Asia                    | 2013 | 48   |     | 48   |     | GB    | Naive   |
| 28114955 | Lu17           |                                                                     | Asia                    | 2012 | 332  |     | 118  | 214 |       |         |
| 27750023 | Lu17           |                                                                     | Asia                    | 2013 | 145  |     | 145  |     | GB    | Naive   |
| 28946751 | Lu18           |                                                                     | Asia                    | 2013 | 317  |     | 317  |     | GB    | Naive   |
| 31595767 | Lu19           |                                                                     | Asia                    | 2018 | 138  |     | 138  |     | GB    | Naive   |
| 22573849 | Luebbert12     |                                                                     | Sub-Saharan Africa      | 2009 | 32   |     |      | 32  | HIVDB | Same Rx |
| 26599538 | Luk15          |                                                                     | Sub-Saharan Africa      | 2007 | 25   |     | 25   |     | GB    | Naive   |
| 22860694 | Lur13          |                                                                     | Europe                  | 2008 | 145  |     | 145  |     | GB    | Naive   |
| 29698470 | Lur18          |                                                                     | Europe                  | 2014 | 168  |     | 168  |     | GB    | Naive   |
| 30682549 | Lur19          |                                                                     | Europe                  | 2009 | 353  |     | 353  |     | GB    | Naive   |
| 22264071 | Luu12          |                                                                     | Asia                    | 2008 | 56   |     | 56   |     | GB    | Naive   |
| 22985307 | Machado13      |                                                                     | Latin America/Caribbean | 2010 | 199  |     | 199  |     | GB    | Naive   |
| 28403828 | Machado17      |                                                                     | Latin America/Caribbean | 2007 | 34   |     |      | 34  |       |         |
| 31479466 | Machado19      |                                                                     | Latin America/Caribbean | 2017 | 141  |     | 141  |     | GB    | Naive   |
| 28562612 | Machnowska17   |                                                                     | Sub-Saharan Africa      | 2013 | 49   |     |      | 49  |       |         |
| 30650082 | Machnowska19   |                                                                     | Europe                  | 2012 | 2052 |     | 2052 |     | GB    | Naive   |
| 22888273 | Maiga12        |                                                                     | Sub-Saharan Africa      | NA   | 93   |     |      | 93  |       |         |
| 22823755 | Maiga13        |                                                                     | Sub-Saharan Africa      | 2010 | 51   |     | 51   |     |       |         |
| 28010730 | Makoola16      |                                                                     | Sub-Saharan Africa      | 2013 | 110  |     |      | 110 |       |         |
| 21474479 | Malet11        |                                                                     | Europe                  | NA   | 734  |     | 650  | 84  |       |         |
| 26205139 | Malet15        |                                                                     | Europe                  | 2011 | 1    |     |      | 1   |       |         |
| 23724311 | Mamadou11      |                                                                     | Sub-Saharan Africa      | 2009 | 96   |     | 96   |     |       |         |
| 22251009 | Manasa11       |                                                                     | Sub-Saharan Africa      | 2010 | 71   |     | 71   |     | GB    | Naive   |
| 25865972 | Mani15         |                                                                     | Asia                    | 2010 | 53   |     |      | 53  | GB    | NA      |
| 22180722 | Manolescu11    |                                                                     | Europe                  | 2007 | 38   |     |      | 38  | GB    | NA      |
| 20507208 | Manosuthi10    |                                                                     | Asia                    | 2007 | 134  |     |      | 134 | HIVDB | HIVDB   |
| 23161095 | Manosuthi13    |                                                                     | Asia                    | 2010 | 330  |     | 330  |     |       |         |
| 19901096 | Marcelin10     |                                                                     | Europe                  | NA   | 243  |     |      | 243 |       |         |
| 22267476 | Marcelin12     |                                                                     | Europe                  | NA   | 42   |     |      | 42  |       |         |
| 23562640 | Marcelin13     |                                                                     | Europe                  | NA   | 63   |     |      | 63  |       |         |
| 27873586 | Marcelin14     |                                                                     | Europe                  | NA   | 416  |     |      | 416 |       |         |
| 30789205 | Marcelin19     |                                                                     | Europe                  | 2015 | 674  |     |      | 674 | HIVDB | HIVDB   |
| 29627709 | Margot18       | GS-US-292-0104<br>(NCT01780506);<br>GS-US-292-0111<br>(NCT01797445) | Multiple                | 2013 | 1733 |     | 1733 | 44  |       |         |
| 31389026 | Margot19       |                                                                     | Multiple                | 2013 | 1820 |     | 1820 |     | GB    | Naive   |
| 27992788 | Mariro17       |                                                                     | Europe                  | NA   | 19   |     |      | 19  |       |         |
| 28959068 | Martin-Odoom17 |                                                                     | Sub-Saharan Africa      | NA   | 26   |     | 26   |     |       |         |
| 30223845 | Martin-Odoom18 |                                                                     | Sub-Saharan Africa      | 2011 | 116  |     |      | 116 |       |         |
| 23991055 | Masa13         |                                                                     | Sub-Saharan Africa      | 2011 | 222  |     |      | 222 | GB    | HIVDB   |
| 27002368 | Masa16         |                                                                     | Sub-Saharan Africa      | 2011 | 701  |     | 701  |     |       |         |
| 23806135 | Masimba13      |                                                                     | Sub-Saharan Africa      | 2007 | 226  |     | 226  |     | GB    | Naive   |

|          |                   |                                                                     |                          |      |      |     |      |     |       |       |
|----------|-------------------|---------------------------------------------------------------------|--------------------------|------|------|-----|------|-----|-------|-------|
| 24629078 | Mata-Munguia14    |                                                                     | Latin America/Caribbean  | 2008 | 151  |     | 22   | 129 | GB    | NA    |
| 28969448 | Matsuda18         |                                                                     | Latin America/Caribbean  | 2014 | 319  |     |      | 319 | GB    | NA    |
| 31518723 | Mazzuti19         |                                                                     | Europe                   | 2011 | 668  |     | 668  |     |       |       |
| 30309385 | Mbange18          |                                                                     | Sub-Saharan Africa       | 2015 | 85   |     | 85   |     | GB    | Naive |
| 30534981 | Mbisa18           |                                                                     | Europe                   | 2012 | 835  |     | 835  |     | GB    | Naive |
| 29635462 | Mbunkah18         |                                                                     | Sub-Saharan Africa       | 2015 | 289  |     | 289  |     |       |       |
| 21963935 | McConnell11       |                                                                     | Europe                   | 2009 | 41   |     |      | 41  |       |       |
| 25397492 | McFaul14          |                                                                     | Europe                   | 2012 | 1705 |     | 1705 |     |       |       |
| 31112033 | Megasari19        |                                                                     | Asia                     | 2017 | 48   |     |      | 48  | GB    | NA    |
| 31699942 | Megasari19        |                                                                     | Asia                     | 2018 | 38   |     | 38   |     | GB    | Naive |
| 25492218 | Meini15           |                                                                     | Sub-Saharan Africa       | 2008 | 81   | 81  |      |     | GB    | NA    |
| 26628902 | Meintjes15        |                                                                     | Sub-Saharan Africa       | 2009 | 152  |     |      | 152 |       |       |
| 24920768 | Meixenberger14    |                                                                     | Europe                   | 2008 | 2203 |     | 2203 |     | GB    | Naive |
| 29255731 | Meloni17          |                                                                     | Sub-Saharan Africa       | 2017 | 191  |     |      | 191 | GB    | NA    |
| 25962088 | Memarnejadian15   |                                                                     | Middle East/North Africa | 2011 | 40   |     | 40   |     | GB    | Naive |
| 28983848 | Memarnejadian18   |                                                                     | Middle East/North Africa | 2016 | 41   |     | 41   |     | GB    | Naive |
| 31311021 | Memarnejadian19   |                                                                     | Middle East/North Africa | 2016 | 44   |     |      | 44  | GB    | NA    |
| 27119150 | Mendoza16         |                                                                     | Latin America/Caribbean  | 2010 | 717  |     | 250  | 467 | GB    | NA    |
| 22966822 | Menezes13         |                                                                     | North America            | 2008 | 367  |     | 38   | 329 |       |       |
| 28991024 | Menza17           |                                                                     | North America            | 2013 | 2784 |     | 2784 |     |       |       |
| 24589279 | Meresse14         | Stratall<br>ANRS12110<br>(NCT00301561)                              | Sub-Saharan Africa       | 2008 | 45   |     |      | 45  |       |       |
| 31751428 | Meriki19          |                                                                     | Sub-Saharan Africa       | 2011 | 239  |     | 169  | 70  |       |       |
| 23797690 | Messou13          |                                                                     | Sub-Saharan Africa       | 2007 | 398  |     |      | 398 |       |       |
| 25036184 | Metzner14         |                                                                     | Europe                   | 2010 | 208  |     |      | 208 |       |       |
| 21453184 | Mezei11           |                                                                     | Europe                   | 2010 | 30   |     | 30   |     | GB    | Naive |
| 25867913 | Mills15           | GS-US-299-0102<br>(NCT01565850)                                     | North America            | 2013 | 153  |     | 153  | 5   |       |       |
| 30946148 | Milne19           |                                                                     | Sub-Saharan Africa       | 2009 | 170  |     |      | 170 | GB    | NA    |
| 22145994 | Miri12            |                                                                     | Middle East/North Africa | 2007 | 162  |     | 162  |     | GB    | Naive |
| 26801790 | Misbah16          |                                                                     | Asia                     | 2011 | 102  |     | 37   | 65  | GB    | NA    |
| 30461149 | Modica19          |                                                                     | Europe                   | 2013 | 462  |     |      | 462 |       |       |
| 30861512 | Mohraz18          |                                                                     | Middle East/North Africa | 2015 | 38   |     |      | 38  |       |       |
| 22015077 | Molina12          | GS-US-183-0145<br>(NCT00708162)                                     | Multiple                 | 2010 | 167  |     | 143  | 167 | HIVDB | HIVDB |
| 29925489 | Molina18          | GS-US-380-1844<br>(NCT02603120)                                     | Multiple                 | 2016 | 5    |     |      | 5   |       |       |
| 31740348 | Molina19          | DRIVE-<br>FORWARD<br>(NCT02275780);<br>DRIVE-AHEAD<br>(NCT02403674) | Multiple                 | 2016 | 7    |     |      | 7   |       |       |
| 23016666 | Monge12           |                                                                     | Europe                   | 2008 | 1864 |     | 1864 |     |       |       |
| 24637804 | Monge14           |                                                                     | Europe                   | 2009 | 2781 |     | 2781 |     |       |       |
| 22236055 | Monleau12         |                                                                     | Multiple                 | 2007 | 97   |     | 97   |     | GB    | Naive |
| 27842871 | Montag15          |                                                                     | Europe                   | 2008 | 1730 |     | 803  | 927 |       |       |
| 21087197 | Monteiro-Cunha11  |                                                                     | Latin America/Caribbean  | 2007 | 58   |     | 10   | 48  | GB    | NA    |
| 21258105 | Moorthy11         | NEVEREST<br>(NCT01146873)                                           | Sub-Saharan Africa       | 2010 | 124  | 124 |      |     |       |       |
| 28799325 | Mosco17           |                                                                     | Middle East/North Africa | 2007 | 80   |     | 80   |     |       |       |
| 28272247 | Mossoro-Kpindel17 |                                                                     | Sub-Saharan Africa       | 2011 | 58   | 58  |      |     | GB    | NA    |
| 25649362 | Moura15           |                                                                     | Latin America/Caribbean  | 2012 | 89   |     | 89   |     | GB    | Naive |
| 25411830 | Moura15           |                                                                     | Latin America/Caribbean  | 2012 | 106  |     | 106  |     | GB    | Naive |
| 30946161 | Moyo19            |                                                                     | Sub-Saharan Africa       | 2015 | 1207 |     | 1069 | 138 |       |       |

|          |               |                                    |                         |      |       |     |      |       |       |         |
|----------|---------------|------------------------------------|-------------------------|------|-------|-----|------|-------|-------|---------|
| 21107269 | Mueller11     |                                    | Europe                  | NA   | 38    |     | 2    | 36    |       |         |
| 24655349 | Mulu14        |                                    | Sub-Saharan Africa      | 2009 | 156   |     | 156  |       | GB    | Naive   |
| 26626277 | Mulu15        |                                    | Sub-Saharan Africa      | 2008 | 43    |     | 43   |       | GB    | Naive   |
| 22930496 | Murillo12     |                                    | Latin America/Caribbean | 2008 | 119   |     | 119  |       | GB    | Naive   |
| 23308370 | Musiime13     |                                    | Sub-Saharan Africa      | 2007 | 142   | 142 |      |       |       |         |
| 26458150 | Mutagoma16    |                                    | Sub-Saharan Africa      | 2011 | 57    |     | 57   |       |       |         |
| 25239368 | Mutsvangwa14  |                                    | Sub-Saharan Africa      | 2010 | 38    | 38  |      |       | GB    | Naive   |
| 24352189 | Mutwa14       |                                    | Sub-Saharan Africa      | 2010 | 52    | 57  |      |       |       |         |
| 21857282 | Muwonga11     |                                    | Sub-Saharan Africa      | 2008 | 950   |     | 283  | 93    |       |         |
| 24635391 | Muyldermans14 |                                    | Europe                  | 2008 | 1055  |     | 1055 |       |       |         |
| 21851324 | Myers12       |                                    | Latin America/Caribbean | 2008 | 103   |     | 103  |       | GB    | Naive   |
| 26866979 | Naeger16      | VIKING-4<br>(NCT01568892)          | North America           | 2013 | 6     |     |      | 6     |       |         |
| 26562173 | Ndahimala16   |                                    | Sub-Saharan Africa      | 2012 | 30    |     |      | 30    | GB    | Same Rx |
| 27125473 | Ndahimana16   |                                    | Sub-Saharan Africa      | 2011 | 70    |     |      | 70    | GB    | Same Rx |
| 29353487 | Ndashimye18   |                                    | Sub-Saharan Africa      | 2015 | 410   |     | 366  | 330   | GB    | HIVDB   |
| 21399479 | Ndembi11      |                                    | Sub-Saharan Africa      | 2009 | 70    |     | 70   |       | GB    | Naive   |
| 23742654 | Ndiaye13      |                                    | Sub-Saharan Africa      | 2007 | 60    |     | 60   |       | GB    | Naive   |
| 28298145 | Negi17        |                                    | Asia                    | 2015 | 40    |     |      | 40    | GB    | NA      |
| 26186128 | Nelson15      |                                    | North America           | 2007 | 78    | 78  |      |       | GB    | Naive   |
| 21453185 | Neogi11       |                                    | Asia                    | 2010 | 39    |     | 39   |       | GB    | Naive   |
| 21505320 | Neogi11       |                                    | Asia                    | NA   | 92    |     |      | 92    |       |         |
| 23443042 | Neogi13       |                                    | Asia                    | 2010 | 88    |     | 56   | 32    | GB    | NA      |
| 24699043 | Neogi14       |                                    | Asia                    | 2011 | 297   |     | 297  |       | HIVDB | Naive   |
| 26518047 | Neogi16       |                                    | Multiple                | NA   | 19713 |     | 5963 | 13750 |       |         |
| 26413747 | Neogi16       |                                    | Sub-Saharan Africa      | 2013 | 384   |     |      | 384   | GB    | HIVDB   |
| 31001987 | Nesakumar19   |                                    | Asia                    | 2011 | 52    |     | 52   |       | GB    | Naive   |
| 24929754 | Newman14      |                                    | Sub-Saharan Africa      | 2013 | 300   |     |      | 300   |       |         |
| 28034359 | nfack16       |                                    | Sub-Saharan Africa      | 2009 | 66    |     | 18   | 48    | GB    | NA      |
| 28659324 | nfack17       |                                    | Sub-Saharan Africa      | 2011 | 61    |     | 61   |       | GB    | Naive   |
| 21235306 | Ng11          |                                    | Asia                    | 2008 | 199   |     | 199  |       | GB    | Naive   |
| 23840653 | Ng13          |                                    | Asia                    | 2009 | 459   |     | 459  |       | GB    | Naive   |
| 29117130 | Ngcapu17      |                                    | Sub-Saharan Africa      | 2008 | 140   |     | 28   | 112   |       |         |
| 28745207 | Ngo-Malabo17  |                                    | Sub-Saharan Africa      | 2015 | 167   |     |      | 103   | GB    | NA      |
| 29873733 | Nguyen18      |                                    | Europe                  | 2015 | 134   |     |      | 134   | GB    | HIVDB   |
| 22818969 | Nicot12       |                                    | Europe                  | 2007 | 27    |     | 27   |       |       |         |
| 25542465 | Nicot15       |                                    | Europe                  | 2009 | 131   |     | 131  |       |       |         |
| 25369079 | Niculescu14   |                                    | FSU                     | 2012 | 138   |     | 138  |       | GB    | Naive   |
| 23977189 | Nii-Trebi13   |                                    | Sub-Saharan Africa      | 2009 | 101   |     | 69   | 30    | GB    | HIVDB   |
| 24358257 | Nishizawa13   |                                    | Asia                    | 2008 | 149   |     | 149  |       |       |         |
| 21094281 | Nouhin11      |                                    | Asia                    | 2007 | 49    |     | 49   |       | GB    | Naive   |
| 24404149 | Nunes14       |                                    | Latin America/Caribbean | 2009 | 47    |     |      | 47    | GB    | NA      |
| 21957668 | Nwobegahay11  |                                    | Sub-Saharan Africa      | 2008 | 54    |     | 54   |       | GB    | Naive   |
| 21837878 | Nwobegahay11  |                                    | Sub-Saharan Africa      | 2008 | 58    |     | 58   |       | GB    | Naive   |
| 23080485 | Nwobegahay12  |                                    | Sub-Saharan Africa      | 2008 | 81    |     | 81   |       | GB    | Naive   |
| 25397501 | Obermeier14   |                                    | Europe                  | 2010 | 220   |     |      | 220   |       |         |
| 22497664 | Oliveira12    |                                    | Sub-Saharan Africa      | 2010 | 57    |     | 57   |       | GB    | Naive   |
| 26244386 | Olson15       | IMPAACT<br>P1032 (NCT00109<br>590) | Asia                    | 2007 | 50    |     |      | 50    |       |         |
| 31257432 | Omooja19      |                                    | Sub-Saharan Africa      | 2016 | 97    |     |      | 97    | GB    | NA      |
| 24127302 | Ong14         |                                    | Asia                    | 2009 | 100   |     | 100  |       | GB    | Naive   |
| 31889319 | Onoriode19    |                                    | Sub-Saharan Africa      | 2016 | 48    |     | 48   |       | GB    | Naive   |

|          |                   |                           |                         |      |      |     |      |     |               |         |
|----------|-------------------|---------------------------|-------------------------|------|------|-----|------|-----|---------------|---------|
| 26401720 | Onsongo16         |                           | Sub-Saharan Africa      | 2012 | 63   |     | 63   |     | GB            | Naive   |
| 28178281 | Onywera17         |                           | Sub-Saharan Africa      | 2012 | 87   |     | 87   |     | GB            | Naive   |
| 31833849 | Orkin20           | AMBER<br>(NCT02431247)    | Multiple                | 2014 | 725  |     | 725  | 17  |               |         |
| 31754119 | Oroz19            |                           | Europe                  | 2015 | 404  |     | 404  |     | GB            | Naive   |
| 27897226 | Otecko16          |                           | Sub-Saharan Africa      | 2008 | 100  |     | 100  |     | GB            | Naive   |
| 20954462 | Oumar10           |                           | Europe                  | 2007 | 61   |     |      | 61  |               |         |
| 23138836 | Oyomopito13       |                           | Asia                    | 2008 | 1105 |     | 1105 |     | GB            | Naive   |
| 29293156 | Palumbo18         | HPTN 052<br>(NCT00074581) | Multiple                | 2011 | 211  |     |      | 211 | GB            | NA      |
| 20860532 | Pando11           |                           | Latin America/Caribbean | 2007 | 214  |     | 214  |     |               |         |
| 24892582 | Paolucci14        |                           | Europe                  | 2008 | 61   |     | 61   |     | GB            | Naive   |
| 20509797 | Papathasopoulos10 |                           | Sub-Saharan Africa      | 2007 | 36   |     | 36   |     | GB            | Naive   |
| 29016621 | Paraschiv17       |                           | FSU                     | 2014 | 86   |     | 86   |     | GB            | Naive   |
| 25397487 | Paraskevis14      |                           | Europe                  | 2008 | 2499 |     | 2499 |     |               |         |
| 29137167 | Paraskevis17      |                           | Europe                  | 2009 | 3428 |     | 3428 |     |               |         |
| 21739439 | Parboosing11      |                           | Sub-Saharan Africa      | 2009 | 56   |     | 56   |     | GB            | Naive   |
| 23259737 | Parczewski12      |                           | Europe                  | 2010 | 92   |     | 80   | 12  | GB            | HIVDB   |
| 25397498 | Parczewski14      |                           | Europe                  | 2010 | 833  |     | 833  |     |               |         |
| 25248322 | Parczewski15      |                           | Europe                  | 2012 | 837  |     | 837  |     | GB            | Naive   |
| 26851192 | Parczewski16      |                           | Europe                  | 2010 | 1219 |     | 998  | 221 | GB            | NA      |
| 28017912 | Parczewski17      |                           | Europe                  | 2012 | 172  |     | 172  |     |               |         |
| 23585827 | Parikh13          |                           | Sub-Saharan Africa      | 2010 | 352  |     | 352  |     |               |         |
| 27873613 | Parisi13          |                           | Europe                  | 2008 | 1882 |     | 1882 |     |               |         |
| 25397557 | Pasquau14         |                           | Europe                  | NA   | 33   |     |      | 33  |               |         |
| 28152089 | Patino-Galindo17  |                           | Europe                  | 2009 | 1806 |     | 1806 |     | Fasta<br>file | Naive   |
| 30924679 | Pei19             |                           | Asia                    | 2018 | 84   |     |      | 84  | GB            | NA      |
| 27895013 | Penrose17         |                           | Sub-Saharan Africa      | NA   | 112  |     | 12   | 100 |               |         |
| 29566538 | Penrose18         |                           | Sub-Saharan Africa      | NA   | 112  |     | 12   | 100 |               |         |
| 21942692 | Pere12            |                           | Sub-Saharan Africa      | 2009 | 34   |     |      | 34  | GB            | Same Rx |
| 23416260 | Perez13           |                           | Latin America/Caribbean | 2007 | 401  |     | 401  |     |               |         |
| 28002469 | Perez-Parra16     |                           | Europe                  | 2008 | 50   |     | 50   |     | GB            | Naive   |
| 29084239 | Perez-Parra17     |                           | Europe                  | 2008 | 693  |     | 693  |     | GB            | Naive   |
| 29077926 | Perrier18         |                           | Europe                  | 2014 | 110  |     | 110  |     |               |         |
| 30768160 | Perrier19         |                           | Europe                  | 2014 | 19   |     |      | 19  |               |         |
| 25401747 | Pessoa14          |                           | Latin America/Caribbean | 2010 | 26   |     | 26   |     | GB            | Naive   |
| 25413141 | Pessoa15          |                           | Latin America/Caribbean | 2010 | 43   |     | 43   |     | GB            | Naive   |
| 27031505 | Pessoa16          |                           | Latin America/Caribbean | 2010 | 198  |     | 198  |     | GB            | Naive   |
| 28953964 | Pessoa17          |                           | Latin America/Caribbean | NA   | 128  |     | 128  |     |               |         |
| 30401010 | Petersen18        |                           | Europe                  | 2010 | 1815 |     | 1815 |     |               |         |
| 23372113 | Pham13            |                           | Asia                    | 2008 | 87   |     |      | 87  |               |         |
| 25970090 | Pham15            |                           | Asia                    | 2012 | 61   |     | 61   |     | GB            | Naive   |
| 25332224 | Pham16            |                           | Asia                    | 2010 | 86   | 86  |      |     | GB            | Same Rx |
| 20156106 | Phan10            |                           | Asia                    | 2008 | 184  |     | 184  |     | GB            | Naive   |
| 21970343 | Phuphuakrat12     |                           | Asia                    | 2010 | 118  |     | 108  |     |               |         |
| 24444369 | Pillay14          |                           | Sub-Saharan Africa      | 2012 | 89   | 89  |      |     | GB            | NA      |
| 29791608 | Pimenta18         |                           | Latin America/Caribbean | 2010 | 38   |     | 18   | 20  | GB            | HIVDB   |
| 28474534 | Pinto17           |                           | Oceania                 | 2008 | 6901 |     | 3299 | 349 |               |         |
| 21453487 | Piralla11         |                           | Europe                  | 2008 | 95   |     | 41   |     |               |         |
| 22697883 | Pircher12         |                           | Sub-Saharan Africa      | 2011 | 100  |     | 41   | 57  | GB            | HIVDB   |
| 28746086 | Poppe17           |                           | Sub-Saharan Africa      | 2011 | 219  | 219 |      |     |               |         |



|          |                       |                                                 |                         |      |      |     |      |      |       |         |
|----------|-----------------------|-------------------------------------------------|-------------------------|------|------|-----|------|------|-------|---------|
| 25777187 | Porter15              | GS-US-264-0110<br>(NCT01309243)                 | North America           | 2011 | 33   |     |      | 33   |       |         |
| 27400403 | Pouran16              |                                                 | Europe                  | 2008 | 1159 |     | 1159 |      | GB    | Naive   |
| 20057310 | Poveda10              |                                                 | Europe                  | NA   | 1343 |     |      | 1343 |       |         |
| 24908550 | Pozniak14             | STRATEGY-<br>NNRTI<br>(NCT01495702)             | Multiple                | 2012 | 2    |     |      | 2    |       |         |
| 21449850 | Praparattanapan11     |                                                 | Asia                    | 2010 | 420  |     | 295  | 125  | GB    | NA      |
| 22299468 | Praparattanapan11     |                                                 | Asia                    | 2008 | 59   |     |      | 59   |       |         |
| 27355415 | Prasitsuebsai16       | TASER-P<br>(NCT01788891)                        | Asia                    | 2011 | 48   | 48  |      |      |       |         |
| 21091377 | Price11               |                                                 | Sub-Saharan Africa      | 2008 | 408  |     | 408  |      | GB    | Naive   |
| 22380531 | Pulido12              | Monet<br>(NCT00458302)                          | Europe                  | 2008 | 54   |     |      | 54   |       |         |
| 23869225 | Qi13                  |                                                 | Asia                    | 2008 | 65   |     | 65   |      | GB    | Naive   |
| 24074642 | Raffi13               | SPRING-2<br>(NCT01227824)                       | Multiple                | 2010 | 30   |     | 30   | 30   |       |         |
| 29546333 | Ragonnet-Cronin18     |                                                 | Europe                  | 2015 | 104  |     | 104  |      | GB    | Naive   |
| 21149999 | Rajesh10              |                                                 | Asia                    | 2007 | 26   |     |      | 26   |       |         |
| 26122980 | Ramkissoon15          |                                                 | Latin America/Caribbean | 2010 | 40   | 40  |      |      | GB    | HIVDB   |
| 20704494 | Rangel10              |                                                 | Latin America/Caribbean | 2009 | 57   |     | 24   |      | GB    | Naive   |
| 30555720 | Rasmussen18           |                                                 | Sub-Saharan Africa      | 2011 | 212  |     | 212  |      | GB    | Naive   |
| 24069209 | Rawizza13             |                                                 | Sub-Saharan Africa      | 2010 | 61   |     |      | 61   | GB    | Same Rx |
| 29244143 | Raymond18             |                                                 | Europe                  | 2013 | 541  |     | 541  |      |       |         |
| 22615779 | Recordon-Pinson12     |                                                 | Asia                    | 2010 | 45   |     | 18   | 27   | GB    | NA      |
| 23184711 | Reigadas13            |                                                 | Europe                  | 2008 | 590  |     | 590  |      | GB    | Naive   |
| 26746222 | Reinheimer16          |                                                 | Europe                  | 2009 | 4509 |     |      | 4509 |       |         |
| 24037943 | Reis14                |                                                 | Latin America/Caribbean | 2009 | 98   |     |      | 98   | GB    | NA      |
| 29091580 | Ren17                 |                                                 | Asia                    | 2016 | 88   |     |      | 88   | GB    | NA      |
| 22443282 | Reynolds12            |                                                 | Sub-Saharan Africa      | 2007 | 42   |     |      | 42   | GB    | HIVDB   |
| 23270482 | Reynolds12            |                                                 | Sub-Saharan Africa      | 2008 | 109  |     |      | 109  | GB    | Same Rx |
| 28365230 | Rheel17               |                                                 | North America           | 2012 | 2873 |     |      | 2873 | GB    | Same Rx |
| 29846534 | Rheel19               |                                                 | North America           | 2011 | 4253 |     | 4253 |      | HIVDB | Naive   |
| 23714781 | Rimsky13              | ECHO( NCT00540<br>449); THRIVE<br>(NCT00543725) | Multiple                | 2009 | 128  |     | 128  | 128  |       |         |
| 26267615 | Robineau15            |                                                 | Europe                  | 2010 | 547  |     | 547  |      |       |         |
| 24093951 | Rodriguez-Rodrigues13 |                                                 | Latin America/Caribbean | 2010 | 152  |     | 152  |      |       |         |
| 27021341 | Rojas16               |                                                 | Europe                  | NA   | 1    |     |      | 1    |       |         |
| 28991889 | Rojas18               |                                                 | Europe                  | 2009 | 240  | 240 |      |      | GB    | NA      |
| 25273080 | Rokx15                |                                                 | Europe                  | 2008 | 88   |     |      | 88   | GB    | Same Rx |
| 20380480 | Ross10                |                                                 | North America           | NA   | 106  |     | 106  |      |       |         |
| 24586911 | Ross14                |                                                 | North America           | 2007 | 690  |     | 690  |      | GB    | Naive   |
| 29932313 | Rossetti18            |                                                 | Europe                  | 2011 | 3573 |     | 3573 |      |       |         |
| 23458243 | Rossi13               |                                                 | Latin America/Caribbean | 2009 | 201  | 201 |      |      | GB    | NA      |
| 24838991 | Rossotti14            |                                                 | Europe                  | NA   | 8067 |     | 1914 | 6153 |       |         |
| 22412066 | Rottinghaus12         |                                                 | Sub-Saharan Africa      | 2008 | 25   |     |      | 25   |       |         |
| 25303690 | Rottinghaus14         |                                                 | Sub-Saharan Africa      | 2010 | 26   |     |      | 26   | GB    | NA      |
| 29211835 | Rouet17               |                                                 | Asia                    | 2014 | 209  |     | 209  |      | GB    | Naive   |
| 20868414 | Ruan10                |                                                 | Asia                    | 2007 | 38   |     |      | 38   |       |         |
| 25585528 | Ruane15               | INROADS<br>(NCT01199939)                        | North America           | 2011 | 2    |     |      | 2    |       |         |
| 30165451 | Rudovick18            |                                                 | Sub-Saharan Africa      | 2013 | 235  |     | 235  |      | GB    | Naive   |
| 23621421 | Rusconi13             |                                                 | Europe                  | NA   | 2854 |     |      | 2854 |       |         |
| 29957545 | Rusconi18             |                                                 | Europe                  | NA   | 89   |     |      | 89   |       |         |

|          |                 |                                 |                          |      |      |     |      |     |    |         |
|----------|-----------------|---------------------------------|--------------------------|------|------|-----|------|-----|----|---------|
| 22905148 | Rusine12        |                                 | Sub-Saharan Africa       | 2008 | 138  |     | 138  |     |    |         |
| 23950859 | Rusine13        |                                 | Sub-Saharan Africa       | 2008 | 109  |     | 109  | 8   | GB | HIVDB   |
| 28149058 | Sachithandham16 |                                 | Asia                     | 2013 | 102  |     | 102  |     | GB | Naive   |
| 26892382 | Saeng-Aroon16   |                                 | Asia                     | 2008 | 158  |     | 158  |     | GB | Naive   |
| 28569550 | SahBandar17     |                                 | Asia                     | 2013 | 109  |     | 109  |     | GB | Naive   |
| 21990611 | Saini12         |                                 | Asia                     | 2007 | 33   |     |      | 33  | GB | NA      |
| 26192603 | Salimo15        |                                 | Sub-Saharan Africa       | 2014 | 232  | 232 |      |     |    |         |
| 27125320 | Saloul6         |                                 | Sub-Saharan Africa       | 2014 | 125  | 125 |      |     | GB | NA      |
| 27167115 | Saloul6         |                                 | Sub-Saharan Africa       | 2012 | 201  | 201 |      |     | GB | Naive   |
| 28602726 | Salvana14       |                                 | Asia                     | 2013 | 81   |     | 81   |     | GB | Naive   |
| 25940687 | Samuel15        |                                 | Sub-Saharan Africa       | 2011 | 44   |     |      | 44  |    |         |
| 21975076 | Santos11        |                                 | Latin America/Caribbean  | 2007 | 168  |     | 168  |     | GB | Naive   |
| 22431669 | Santos12        |                                 | Europe                   | NA   | 195  |     |      | 195 |    |         |
| 26490727 | Santos15        |                                 | Europe                   | 2010 | 33   |     |      | 33  |    |         |
| 28585361 | Sapozhnikov17   |                                 | North America            | 2013 | 105  |     | 105  |     |    |         |
| 27704010 | Saran16         | ACTG A5230<br>(NCT00357552)     | Multiple                 | 2009 | 34   |     |      | 34  |    |         |
| 21876445 | Saravan11       |                                 | Asia                     | NA   | 582  |     | 58   | 524 |    |         |
| 22323567 | Saravan12       |                                 | Asia                     | 2009 | 45   |     |      | 45  |    |         |
| 25839730 | Saravan15       |                                 | Asia                     | 2014 | 546  |     |      | 546 | GB | Same Rx |
| 27869478 | Saravan17       |                                 | Asia                     | 2012 | 97   | 97  |      |     |    |         |
| 23045961 | Saravanan13     |                                 | Asia                     | 2011 | 87   |     |      | 87  | GB | NA      |
| 28867499 | Sax17           | GS-US-380-1490<br>(NCT02607956) | Multiple                 | 2016 | 12   |     |      | 12  |    |         |
| 23883841 | Sayan13         |                                 | Europe                   | 2012 | 117  |     | 117  |     | GB | Naive   |
| 25397495 | Sayan14         |                                 | Middle East/North Africa | 2011 | 774  |     | 774  |     |    |         |
| 27125365 | Sayan16         |                                 | Europe                   | 2014 | 169  |     | 169  |     |    | NA      |
| 26414663 | Sayan17         |                                 | Europe                   | 2012 | 1306 |     | 1306 |     | GB | Naive   |
| 23189194 | Scherrer12      |                                 | Europe                   | NA   | 228  |     |      | 228 |    |         |
| 31330378 | Scutari19       |                                 | Europe                   | NA   | 39   |     |      | 39  |    |         |
| 26016726 | Seal16          |                                 | North America            | 2010 | 226  |     | 226  |     |    |         |
| 31751353 | Seatla19        |                                 | Sub-Saharan Africa       | 2014 | 45   |     | 45   |     | GB | Naive   |
| 31770425 | Sebastiao19     |                                 | Sub-Saharan Africa       | 2018 | 34   |     | 34   |     | GB | Naive   |
| 24215971 | Sebunya13       |                                 | Sub-Saharan Africa       | 2008 | 109  | 109 |      |     |    |         |
| 29662875 | Segeeral18      | ANRS 12276<br>(NCT01801618)     | Asia                     | 2013 | 54   |     |      | 54  |    |         |
| 25754408 | Seu15           |                                 | Sub-Saharan Africa       | 2010 | 68   |     |      | 68  | GB | HIVDB   |
| 24976142 | Sey14           |                                 | North America            | 2008 | 1414 |     | 1414 |     |    |         |
| 21591988 | Shah11          |                                 | Middle East/North Africa | 2008 | 42   |     | 31   | 11  |    |         |
| 24729604 | Shao14          |                                 | Sub-Saharan Africa       | 2011 | 46   | 46  |      |     | GB | Naive   |
| 30315192 | Sharma18        |                                 | Asia                     | 2017 | 56   |     | 18   | 38  | GB | NA      |
| 25035709 | Shen14          |                                 | Asia                     | 2011 | 133  |     | 133  |     |    |         |
| 25025900 | Shiino14        |                                 | Asia                     | 2007 | 243  |     | 243  |     | GB | Naive   |
| 29633077 | Shu18           |                                 | Asia                     | 2015 | 51   |     | 51   |     | GB | Naive   |
| 21475993 | Sierra11        |                                 | Europe                   | NA   | 427  |     | 427  |     |    |         |
| 21694603 | Sigaloff11      |                                 | Sub-Saharan Africa       | 2008 | 173  |     |      | 173 | GB | HIVDB   |
| 22149307 | Sigaloff12      |                                 | Sub-Saharan Africa       | 2009 | 73   |     | 73   |     | GB | Naive   |
| 23517497 | Sigaloff13      |                                 | Sub-Saharan Africa       | 2010 | 44   | 44  |      |     | GB | Same Rx |
| 30198436 | Sili18          |                                 | Middle East/North Africa | 2013 | 36   |     | 36   |     |    |         |
| 29040633 | Silverman17     |                                 | Sub-Saharan Africa       | 2014 | 987  |     | 987  |     |    |         |
| 22496972 | Sinha12         |                                 | Asia                     | 2007 | 31   |     | 31   |     | GB | Naive   |
| 22716105 | Sinha12         |                                 | Asia                     | 2009 | 128  |     |      | 128 |    |         |
| 30046244 | Sinha18         |                                 | Asia                     | 2014 | 115  |     | 115  |     |    |         |

|          |                  |                                  |                         |      |      |     |      |      |       |         |
|----------|------------------|----------------------------------|-------------------------|------|------|-----|------|------|-------|---------|
| 25525199 | Sirivichayakul15 |                                  | Asia                    | 2009 | 284  |     | 284  |      |       |         |
| 27460519 | Sivamalar17      |                                  | Asia                    | 2010 | 101  |     |      | 101  | GB    | NA      |
| 25659108 | Skhosa15         |                                  | Sub-Saharan Africa      | 2011 | 160  |     |      | 160  | GB    | HIVDB   |
| 28379449 | Smit17           |                                  | Europe                  | NA   | 4220 |     |      | 4220 |       |         |
| 23822819 | Smolen-Dzirba13  |                                  | Europe                  | 2009 | 54   |     | 54   |      | GB    | Naive   |
| 28167814 | Smolen-Dzirba17  |                                  | FSU                     | 2012 | 56   |     | 56   |      | GB    | Naive   |
| 31574109 | Soldi19          |                                  | Latin America/Caribbean | 2015 | 1696 |     |      | 1696 | GB    | NA      |
| 22544195 | Somda12          |                                  | Sub-Saharan Africa      | 2008 | 48   |     | 48   |      | GB    | Naive   |
| 29345606 | Song18           |                                  | Asia                    | 2014 | 932  |     | 932  |      |       |         |
| 31146045 | Soodla19         |                                  | Europe                  | 2013 | 224  |     | 224  |      |       |         |
| 21819256 | Sorial2          |                                  | Latin America/Caribbean | 2008 | 37   |     | 37   |      | GB    | Naive   |
| 30560685 | Sorial19         |                                  | Latin America/Caribbean | 2014 | 122  |     | 122  |      | GB    | Naive   |
| 29371105 | Sorstedt18       |                                  | Europe                  | NA   | 7    |     |      | 7    |       |         |
| 23542639 | Souda13          |                                  | Sub-Saharan Africa      | 2008 | 54   |     |      | 54   | GB    | NA      |
| 25420695 | Soulie15         |                                  | Europe                  | 2014 | 96   |     |      | 96   | GB    | NA      |
| 29945251 | Spertilli18      |                                  | Europe                  | 2012 | 1365 |     | 1365 |      |       |         |
| 22616647 | Ssemwanga12      |                                  | Sub-Saharan Africa      | 2007 | 72   |     | 72   |      | GB    | Naive   |
| 22544200 | Ssemwanga12      |                                  | Sub-Saharan Africa      | 2009 | 42   |     | 42   |      | GB    | Naive   |
| 24635515 | Stanojevic14     |                                  | FSU                     | 2009 | 103  |     | 103  |      | GB    | Naive   |
| 24816790 | Steegen14        |                                  | Sub-Saharan Africa      | 2011 | 370  | 354 |      |      | GB    | HIVDB   |
| 27907009 | Steegen16        |                                  | Sub-Saharan Africa      | 2014 | 277  |     | 277  |      | GB    | Naive   |
| 27923946 | Steegen16        |                                  | Sub-Saharan Africa      | 2014 | 350  |     |      | 350  | GB    | Same Rx |
| 27659733 | Steegen17        |                                  | Sub-Saharan Africa      | 2014 | 788  |     |      | 788  | GB    | HIVDB   |
| 31433056 | Steegen19        |                                  | Sub-Saharan Africa      | 2017 | 43   |     |      | 43   | GB    | Same Rx |
| 21827673 | Steinberg11      |                                  | North America           | 2007 | 987  |     | 987  |      |       |         |
| 24831260 | Stekler15        |                                  | North America           | 2010 | 69   |     | 69   |      | GB    | Naive   |
| 22237471 | Sterrantino12    |                                  | Europe                  | 2008 | 118  |     |      | 118  |       |         |
| 22067663 | Sterrantino12    |                                  | Europe                  | 2008 | 1104 |     |      | 1104 |       |         |
| 30769200 | Sterrantino19    |                                  | Europe                  | NA   | 6893 |     |      | 6893 |       |         |
| 21916807 | Su12             |                                  | Asia                    | 2008 | 124  |     | 124  |      | GB    | Naive   |
| 25160759 | Su14             |                                  | Asia                    | 2011 | 375  |     | 104  | 271  |       |         |
| 30668734 | Su19             |                                  | Asia                    | 2014 | 50   |     | 50   |      |       |         |
| 25838288 | Suaysod15        | NCT00433030                      | Asia                    | 2009 | 53   | 53  |      |      | GB    | NA      |
| 30681000 | Sun19            |                                  | Asia                    | 2016 | 110  |     | 110  |      | GB    | Naive   |
| 22410286 | Sungkanuparph12  |                                  | Asia                    | 2008 | 466  |     | 466  |      |       |         |
| 22739389 | Sunpath12        |                                  | Sub-Saharan Africa      | 2011 | 38   |     |      | 38   | HIVDB | HIVDB   |
| 28582463 | Sv√\$rd17        |                                  | Sub-Saharan Africa      | 2013 | 82   |     | 13   | 69   | GB    | HIVDB   |
| 20739898 | Svicher10        |                                  | Europe                  | NA   | 352  |     |      | 352  |       |         |
| 31307909 | Sylla19          |                                  | Asia                    | NA   | 33   | 33  |      |      |       |         |
| 29136032 | Szubert17        | ARROW<br>(NCT02028676)           | Sub-Saharan Africa      | 2010 | 110  | 110 |      |      | GB    | Same Rx |
| 29389912 | Tadesse18        |                                  | Sub-Saharan Africa      | 2017 | 90   | 90  |      |      | GB    | Same Rx |
| 31546824 | Tadesse19        |                                  | Sub-Saharan Africa      | 2018 | 93   | 93  |      |      | GB    | Naive   |
| 20163340 | Taiwo10          |                                  | Sub-Saharan Africa      | NA   | 91   |     |      | 91   |       |         |
| 21857490 | Taiwo11          | ACTG<br>A5262(NCT00830<br>804)   | North America           | 2009 | 137  |     | 112  | 25   |       |         |
| 30804893 | Taka19           |                                  | Latin America/Caribbean | 2014 | 149  |     | 149  |      | GB    | Naive   |
| 30799830 | Takassi18        |                                  | Sub-Saharan Africa      | 2014 | 36   | 36  |      |      |       |         |
| 25873310 | Tamalet15        |                                  | Europe                  | 2009 | 73   |     | 73   |      | GB    | Naive   |
| 29797570 | Tamalet18        |                                  | Europe                  | 2013 | 48   |     | 48   |      | GB    | Naive   |
| 20854144 | Tambuyzer10      | Duet-1 & Duet-2<br>(NCT00359021) | Multiple                | 2010 | 93   |     |      | 93   |       |         |

|          |                  |                                 |                          |      |      |      |      |      |    |         |
|----------|------------------|---------------------------------|--------------------------|------|------|------|------|------|----|---------|
| 26566161 | Tambuyzer16      | PIANO<br>(NCT00665847)          | Multiple                 | 2010 | 41   | 41   |      |      |    |         |
| 24815852 | Tanuma14         |                                 | Asia                     | 2010 | 1390 |      | 1390 |      | GB | Naive   |
| 25926858 | Tashima14        | GS-US-216-0130<br>(NCT01440569) | North America            | 2011 | 295  |      | 295  | 15   |    |         |
| 21345162 | Taylor11         |                                 | Sub-Saharan Africa       | NA   | 244  | 244  |      |      |    |         |
| 29931063 | Tchouwa18        |                                 | Sub-Saharan Africa       | 2015 | 337  |      | 337  |      | GB | Naive   |
| 31193678 | Tchouwa18        |                                 | Sub-Saharan Africa       | 2015 | 221  |      |      | 221  | GB | HIVDB   |
| 25397485 | Teeraipong14     |                                 | Asia                     | 2007 | 2086 |      |      | 2086 |    |         |
| 23959846 | Telan13          |                                 | Asia                     | 2011 | 174  |      | 174  |      | GB | Naive   |
| 29765082 | Telele18         |                                 | Sub-Saharan Africa       | 2010 | 461  |      | 461  |      | GB | Naive   |
| 31262272 | Telele19         |                                 | Sub-Saharan Africa       | 2010 | 76   |      |      | 76   | GB | NA      |
| 23592112 | Temereanca13     |                                 | Europe                   | 2007 | 61   |      | 61   |      | GB | Naive   |
| 29213206 | Temereanca17     |                                 | Europe                   | 2012 | 61   |      | 61   |      | GB | Naive   |
| 26831472 | TenoRes16        |                                 | Sub-Saharan Africa       | 2012 | 1926 |      |      | 1926 | GB | Same Rx |
| 29074854 | Teto17           |                                 | Sub-Saharan Africa       | 2011 | 141  |      | 109  | 32   | GB | NA      |
| 25704446 | Theys15          |                                 | Europe                   | NA   | 1212 |      |      | 1212 |    |         |
| 26651266 | Theys16          |                                 | Europe                   | NA   | 4631 |      | 4631 |      |    |         |
| 23241378 | Thiam13          |                                 | Sub-Saharan Africa       | 2009 | 72   |      |      | 72   | GB | NA      |
| 30060027 | Thompson19       | EARNEST( NCT0<br>0988039)       | Multiple                 | 2012 | 363  |      |      | 363  | GB | Same Rx |
| 22327248 | Thomson12        |                                 | Europe                   | 2010 | 41   |      | 41   |      | GB | Naive   |
| 21568760 | Thorat11         |                                 | Asia                     | 2008 | 47   |      | 47   |      | GB | Naive   |
| 31190911 | Tien19           |                                 | Asia                     | 2008 | 47   |      |      | 47   |    |         |
| 25614045 | Todesco15        |                                 | Europe                   | NA   | 26   |      |      | 26   |    |         |
| 28444829 | Todesco17        |                                 | Europe                   | 2010 | 140  |      | 140  |      |    |         |
| 30585843 | Todesco19        |                                 | Europe                   | 2012 | 70   |      | 70   |      |    |         |
| 21875619 | Toor11           |                                 | Asia                     | 2009 | 149  |      | 129  | 20   |    |         |
| 24913409 | Torres-Cornejo15 | MonDAR<br>(NCT01606722)         | Europe                   | 2011 | 42   |      |      | 42   |    |         |
| 23470353 | Tramuto13        |                                 | Europe                   | 2009 | 46   |      | 46   |      | GB | Naive   |
| 22264087 | Tran12           |                                 | Asia                     | 2008 | 107  |      | 107  |      | GB | Naive   |
| 31773888 | Trebelcock19     |                                 | Latin America/Caribbean  | 2014 | 471  |      | 471  |      |    |         |
| 29861843 | Tsai18           |                                 | Asia                     | 2014 | 178  |      | 178  |      |    |         |
| 30122963 | Tsai18           |                                 | Asia                     | 2016 | 39   |      | 8    | 31   |    |         |
| 29081666 | Tshabalala17     |                                 | Asia                     | 2011 | 280  |      |      | 280  |    |         |
| 21698125 | Tully11          |                                 | Sub-Saharan Africa       | 2007 | 206  |      | 206  |      | GB | Naive   |
| 27163788 | Turriziani16     |                                 | Multiple                 | 2008 | 71   |      | 71   |      | GB | Naive   |
| 22214532 | Ueda12           |                                 | Sub-Saharan Africa       | NA   | 33   |      | 33   |      |    |         |
| 30229669 | Vahabpour18      |                                 | Asia                     | 2016 | 42   |      |      | 42   | GB | NA      |
| 28181034 | Vairo17          |                                 | Middle East/North Africa | 2016 | 42   |      | 42   |      | GB | Naive   |
| 21239995 | van11            |                                 | Sub-Saharan Africa       | NA   | 33   |      |      | 33   |    |         |
| 21837793 | Van11            |                                 | Sub-Saharan Africa       | 2008 | 167  |      |      | 167  | GB | Same Rx |
| 24053581 | van13            |                                 | Sub-Saharan Africa       | 2010 | 97   |      | 97   |      |    |         |
| 26595539 | van16            |                                 | Asia                     | 2013 | 359  |      | 359  |      | GB | Naive   |
| 28857824 | van17            |                                 | Sub-Saharan Africa       | 2016 | 59   |      | 59   |      | GB | Naive   |
| 31088600 | Van19            |                                 | Europe                   | 2015 | 1417 |      | 1417 |      |    |         |
| 23840622 | varro13          |                                 | Sub-Saharan Africa       | 2010 | 1416 | 1416 |      |      | GB | HIVDB   |
| 26200738 | Vaz15            |                                 | Latin America/Caribbean  | 2012 | 41   | 41   |      |      | GB | NA      |
| 30723941 | Vaz19            |                                 | Europe                   | 2016 | 1    |      |      | 1    |    |         |
| 22544205 | Verheyen12       |                                 | Sub-Saharan Africa       | 2008 | 112  | 112  |      |      | GB | HIVDB   |
| 20834103 | Verhofstede10    |                                 | Europe                   | NA   | 58   |      | 58   |      |    |         |
| 29187159 | Verhofstede17    |                                 | Europe                   | 2014 | 539  |      | 539  |      | GB | Naive   |

|          |                   |                                                   |                         |      |      |   |      |      |       |         |
|----------|-------------------|---------------------------------------------------|-------------------------|------|------|---|------|------|-------|---------|
| 29522828 | Verhofstede19     |                                                   | Europe                  | 2014 | 1479 |   | 1479 |      | GB    | Naive   |
| 31779195 | Vicia19           |                                                   | Europe                  | 2015 | 927  |   | 927  |      |       |         |
| 30951600 | Vidal19           | IMPAACT P1093<br>(NCT01302847)                    | Multiple                | 2007 | 6    | 6 |      | 6    |       |         |
| 26483513 | Villabo-Ares16    |                                                   | Europe                  | NA   | 30   |   | 30   |      | GB    | Naive   |
| 21670925 | Vingerhoets11     |                                                   | Latin America/Caribbean | 2007 | 171  |   |      | 171  |       |         |
| 27603287 | Volz16            |                                                   | Sub-Saharan Africa      | NA   | 3736 |   | 2137 | 1599 |       |         |
| 22951490 | von13             | ECHO<br>(NCT00540449);<br>THRIVE<br>(NCT00543725) | Multiple                | 2009 | 1796 |   | 1796 |      |       |         |
| 29506269 | Vrancken18        |                                                   | Europe                  | 2009 | 6912 |   | 6912 |      |       |         |
| 29771783 | Wadonda-Kabondo18 |                                                   | Sub-Saharan Africa      | 2015 | 315  |   | 152  | 163  | GB    | NA      |
| 28427935 | Wainberg17        |                                                   | North America           | 2010 | 1055 |   | 1055 |      | GB    | Naive   |
| 22544197 | Wallis12          |                                                   | Sub-Saharan Africa      | 2007 | 109  |   | 109  |      |       |         |
| 21750100 | Wang11            |                                                   | North America           | 2007 | 204  |   | 204  |      | GB    | Naive   |
| 24795328 | Wang14            | ACTG A5230<br>(NCT00357552)                       | Multiple                | 2009 | 148  |   |      | 148  | GB    | NA      |
| 26129754 | Wang15            |                                                   | Asia                    | 2010 | 175  |   | 175  |      | GB    | Naive   |
| 29870534 | Wang18            |                                                   | Asia                    | 2015 | 525  |   | 525  |      | GB    | Naive   |
| 30961560 | Wang19            |                                                   | Asia                    | 2017 | 80   |   | 80   |      | GB    | Naive   |
| 27922196 | Weng15            |                                                   | Asia                    | 2008 | 223  |   | 223  |      | GB    | Naive   |
| 30086369 | Weng18            |                                                   | Asia                    | 2014 | 270  |   | 270  |      | GB    | Naive   |
| 31443633 | White19           |                                                   | Asia                    | 2011 | 377  |   | 377  |      |       |         |
| 25315212 | Wijting16         |                                                   | Asia                    | 2010 | 161  |   | 161  |      | HIVDB | Same Rx |
| 25321623 | Wilhelmson15      | GS-US-236-0102<br>(NCT01095796)                   | North America           | 2010 | 700  |   | 700  | 49   |       |         |
| 29617822 | Witaningrum18     | DOMONO<br>(NCT02401828)                           | Europe                  | 2016 | 8    |   |      | 8    |       |         |
| 30379960 | Wright18          |                                                   | Sub-Saharan Africa      | 2017 | 54   |   | 54   |      | GB    | Naive   |
| 21289112 | Wu11              |                                                   | Sub-Saharan Africa      | 2008 | 73   |   | 73   |      | GB    | Naive   |
| 27009513 | Wu16              |                                                   | Asia                    | 2014 | 41   |   | 41   |      | GB    | Naive   |
| 31248372 | Wu19              |                                                   | Asia                    | 2017 | 362  |   | 362  |      | GB    | Naive   |
| 26123125 | Xu15              |                                                   | Asia                    | 2013 | 99   |   | 99   |      | GB    | Naive   |
| 23372706 | Xuan13            |                                                   | Asia                    | 2011 | 133  |   | 133  |      | GB    | Naive   |
| 29637428 | Yabar18           |                                                   | Asia                    | 2016 | 153  |   | 153  |      | GB    | Naive   |
| 22559065 | Yan12             |                                                   | Latin America/Caribbean | 2009 | 244  |   |      | 244  | GB    | NA      |
| 29739342 | Yan18             |                                                   | Asia                    | 2008 | 32   |   | 32   |      | GB    | Naive   |
| 22587343 | Yang12            |                                                   | Asia                    | 2010 | 119  |   | 119  |      | GB    | Naive   |
| 24945273 | Yang14            |                                                   | Asia                    | 2012 | 35   |   |      | 35   | GB    | NA      |
| 25653132 | Yang15            |                                                   | Asia                    | 2012 | 52   |   | 52   |      | GB    | Naive   |
| 23224760 | Ye13              |                                                   | Asia                    | 2010 | 489  |   | 489  |      |       |         |
| 25919896 | Ye15              |                                                   | Asia                    | 2011 | 254  |   |      | 254  |       |         |
| 21830915 | Yendewa12         |                                                   | Asia                    | 2007 | 139  |   | 139  |      | GB    | Naive   |
| 20950146 | Youmans11         |                                                   | Asia                    | 2007 | 39   |   | 39   |      | GB    | Naive   |
| 30989237 | Yuan19            |                                                   | Sub-Saharan Africa      | 2017 | 215  |   | 64   | 151  |       |         |
| 21206421 | Zain11            |                                                   | North America           | 2007 | 1277 |   | 1277 |      |       |         |
| 28107870 | Zeng17            |                                                   | Asia                    | 2015 | 41   |   | 41   |      | GB    | Naive   |
| 28622345 | Zeng17            |                                                   | Asia                    | 2013 | 205  |   | 205  |      | GB    | Naive   |
| 31651864 | Zeng19            |                                                   | Asia                    | 2014 | 734  |   |      | 734  |       |         |
| 22044422 | Zhang12           |                                                   | Asia                    | 2009 | 113  |   | 113  |      | GB    | Naive   |
| 22563717 | Zhang12           |                                                   | Asia                    | 2007 | 40   |   |      | 40   | GB    | NA      |
| 23943429 | Zhang13           |                                                   | Asia                    | 2009 | 159  |   | 159  |      | GB    | Naive   |
| 25330204 | Zhang14           |                                                   | Asia                    | 2010 | 130  |   |      | 130  |       |         |

|          |             |                           |                          |      |      |  |      |     |    |       |
|----------|-------------|---------------------------|--------------------------|------|------|--|------|-----|----|-------|
| 25899877 | Zhang15     |                           | Asia                     | 2013 | 200  |  | 200  |     | GB | Naive |
| 26020400 | Zhang15     |                           | Asia                     | 2011 | 216  |  | 216  |     | GB | Naive |
| 29066776 | Zhang17     |                           | Asia                     | 2013 | 311  |  | 311  |     |    |       |
| 21417755 | Zhao11      |                           | Asia                     | 2008 | 217  |  | 217  |     |    |       |
| 25469530 | Zhao15      |                           | Asia                     | 2012 | 367  |  | 367  |     |    |       |
| 30115986 | Zhao18      |                           | Asia                     | 2015 | 4704 |  | 4704 |     |    |       |
| 30192818 | Zhao18      |                           | Sub-Saharan Africa       | 2013 | 461  |  |      | 461 | GB | NA    |
| 29985265 | Zhao18      | HPTN 068<br>(NCT01233531) | Sub-Saharan Africa       | 2013 | 198  |  | 198  |     | GB | Naive |
| 27352965 | Zhou16      |                           | Asia                     | 2011 | 1316 |  | 1316 |     | GB | Naive |
| 25333965 | Ziri14      |                           | Asia                     | 2011 | 357  |  | 357  |     | GB | Naive |
| 27807537 | Zuckerman16 |                           | Asia                     | 2012 | 196  |  |      | 196 |    |       |
| 27997554 | Zuo16       |                           | Asia                     | 2014 | 64   |  |      | 64  |    |       |
| 27368990 | Zuo16       |                           | Middle East/North Africa | 2014 | 102  |  | 40   | 62  | GB | NA    |
| 23173702 | Zziwa13     |                           | Sub-Saharan Africa       | 2010 | 48   |  | 48   |     | GB | Naive |
| 30325775 | Zziwa19     |                           | Middle East/North Africa | 2012 | 560  |  | 560  |     | GB | Naive |

### Appendix 3. Clinical Trials

| PMID                                             | AuthorYr      | Trial          | #Pts With Seqs | Seq-RX Link Availability | Regimens                                                                                         | Sponsor                                                         | Journal                        |
|--------------------------------------------------|---------------|----------------|----------------|--------------------------|--------------------------------------------------------------------------------------------------|-----------------------------------------------------------------|--------------------------------|
| <i>Studies with publicly available sequences</i> |               |                |                |                          |                                                                                                  |                                                                 |                                |
| 27342228                                         | Guichet16     | 2LADY          | 446            | Same RX                  | WHO first-line                                                                                   | French National Agency for Research on AIDS and Viral Hepatitis | Clin. Infect. Dis              |
| 22719231                                         | Lockman12     | ACTG 5208      | 38             | RX in HIVDB              | WHO first-line vs. LPV/r-containing regimen in women with history of single-dose NVP             | AIDS Clinical Trials Group                                      | AIDS Res. Hum. Retroviruses    |
| 24795328                                         | Wallis14      | ACTG 5230      | 148            | NA                       | WHO first-line                                                                                   | AIDS Clinical Trials Group                                      | J. Acquir. Immune Defic. Syndr |
| 25285539                                         | Lennox14      | ACTG 5257      | 295            | RX in HIVDB              | First-line ART: ATV/r, DRV/r, vs. RAL-containing regimen                                         | AIDS Clinical Trials Group                                      | Clin. Infect. Dis              |
| 30321314                                         | Derache19     | ANRS 12249     | 1148           | ART-Naïve                | PrEP study                                                                                       | French National Agency for Research on AIDS and Viral Hepatitis | AIDS                           |
| 20802293                                         | Charpentier10 | ANRS 139       | 14             | Same RX                  | Salvage ART: RAL + ETR + DRV/r + optimized background                                            | French National Agency for Research on AIDS and Viral Hepatitis | Pediatr. Infect. Dis. J        |
| 29136032                                         | Szubert17     | ARROW          | 110            | Same RX                  | First-line ART: ABC-containing regimen in children                                               | Medical Research Council                                        | PLoS ONE                       |
| 28129253                                         | Kityo17       | EARNEST        | 787            | NA                       | WHO first-line                                                                                   | Justine Boles                                                   | Ann. Intern. Med               |
| 30060027                                         | Thompson19    | EARNEST        | 363            | Same RX                  | Second-line ART: LPV/r + 2 NRTIs vs. LPV/r monotherapy vs. LPV/r + RAL                           | Justine Boles                                                   | PLoS Med                       |
| 22015077                                         | Molina12      | GS-US-183-0145 | 167            | RX in HIVDB              | Salvage ART: EVG- vs. RAL-containing regimens                                                    | Gilead Sciences                                                 | AIDS Res. Hum. Retroviruses    |
| 23249916                                         | Fogel13       | HPTN 046       | 38             | ART-Naïve                | PMTCT: Infected infants while receiving extended single-dose NVP or placebo                      | National Institute of Allergy and Infectious Diseases           | AIDS Res. Hum. Retroviruses    |
| 29293156                                         | Palumbo18     | HPTN 052       | 211            | NA                       | First-line ART: EFV, ATV/r, LPV/r-containing regimen in index patients in serodiscordant couples | National Institute of Allergy and Infectious Diseases           | AIDS                           |
| 28384058                                         | Chen17        | HPTN 061       | 165            | ART-Naïve                | PrEP study                                                                                       | HIV Prevention Trials Network                                   | Clin. Infect. Dis              |

|                                                            |             |             |     |             |                                                                                                                      |                                                                 |                                |
|------------------------------------------------------------|-------------|-------------|-----|-------------|----------------------------------------------------------------------------------------------------------------------|-----------------------------------------------------------------|--------------------------------|
| 29985265                                                   | Zhang18     | HPTN 068    | 198 | ART-Naïve   | PrEP study                                                                                                           | HIV Prevention Trials Network                                   | PLoS Med                       |
| 29149197                                                   | deCamp17    | HVTN 505    | 47  | ART-Naïve   | Vaccine trial                                                                                                        | National Institute of Allergy and Infectious Diseases           | Clin. Infect. Dis              |
| 25838288                                                   | Suaysod15   | NCT00433030 | 53  | NA          | Second-line ART: PI-containing regimens in children                                                                  | Institut de Recherche pour le Developpement                     | J. Antimicrob. Chemother       |
| 21460326                                                   | Fogel11     | PEPI-Malawi | 37  | ART-Naïve   | PMTCT: Infected infants while mothers were receiving ART                                                             | Johns Hopkins Bloomberg School of Public Health                 | Clin. Infect. Dis              |
| 21487249                                                   | Fogel11     | PEPI-Malawi | 108 | ART-Naïve   | PMTCT: Infected infants while receiving extended NVP or NVP + AZT                                                    | Johns Hopkins Bloomberg School of Public Health                 | J. Acquir. Immune Defic. Syndr |
| 30044302                                                   | Jespersen18 | PIONA       | 56  | NA          | First-line ART: NVP/EFV-containing vs. LPV/r-containing regimen                                                      | University of Aarhus                                            | J. Acquir. Immune Defic. Syndr |
| 27346600                                                   | Lam16       | Second-Line | 491 | RX in HIVDB | WHO first-line                                                                                                       | Kirby Institute                                                 | J. Acquir. Immune Defic. Syndr |
| 27076106                                                   | Hawkins16   | TOV3        | 149 | NA          | First-line ART (Sequences pre- and post-ART)                                                                         | Harvard School of Public Health                                 |                                |
| <b><i>Studies without publicly available sequences</i></b> |             |             |     |             |                                                                                                                      |                                                                 |                                |
| 27704010                                                   | Saran16     | ACTG 5230   | 34  | NA          | Second-line ART: LPV/r monotherapy                                                                                   | AIDS Clinical Trials Group                                      | Open Forum Infect Dis          |
| 21857490                                                   | Taiwo11     | ACTG 5262   | 137 | NA          | First-line ART: DRV/r + RAL (sequences were pre- and post-ART)                                                       | AIDS Clinical Trials Group                                      | AIDS                           |
| 31833849                                                   | Orkin20     | AMBER       | 725 | NA          | First-line ART: single tablet DRV/co/FTC/TAF (D/C/F/TAF) vs. two tablets (D/C + F/TDF) (Sequences pre- and post-ART) | Janssen Sciences Ireland UC                                     | AIDS                           |
| 24589279                                                   | Meresse14   | ANRS 12110  | 45  | NA          | WHO first-line                                                                                                       | French National Agency for Research on AIDS and Viral Hepatitis | HIV Med                        |
| 31601544                                                   | Eholie19    | ANRS 12269  | 175 | NA          | WHO second-line                                                                                                      | French National Agency for Research on AIDS and Viral Hepatitis | Lancet HIV                     |
| 29662875                                                   | Segeral18   | ANRS 12276  | 54  | NA          | WHO second-line                                                                                                      | French National Agency for Research on AIDS and Viral Hepatitis | Front Public Health            |



|          |                  |                            |      |    |                                                                                         |                                                                 |                             |
|----------|------------------|----------------------------|------|----|-----------------------------------------------------------------------------------------|-----------------------------------------------------------------|-----------------------------|
| 21326075 | Gallien11        | ANRS 138                   | 39   | NA | Simplification: RAL + optimized background                                              | French National Agency for Research on AIDS and Viral Hepatitis | AIDS                        |
| 25755001 | Charpentier15    | ANRS 139                   | 80   | NA | Sequences before starting a salvage therapy                                             | French National Agency for Research on AIDS and Viral Hepatitis | J. Antimicrob. Chemother    |
| 26702926 | Lambert-Nielot16 | ANRS 143                   | 110  | NA | First-line ART: DRV/r + RAL vs. DRV/r + NRTIs (Sequences pre- and post-ART)             | French National Agency for Research on AIDS and Viral Hepatitis | J. Antimicrob. Chemother    |
| 21311113 | Lathouwers11     | Artemis                    | 689  | NA | First-line ART: DRV/r + TDF + FTC vs. LPV/r + TDF + FTC (Sequences pre- and post-ART)   | Tibotec Pharmaceuticals, Ireland                                | Antivir. Ther. (Lond.)      |
| 18650513 | Cooper08         | BENCHMARK 1 & 2            | 94   | NA | Salvage ART: RAL + optimized background (Sequences pre- and post-ART)                   | Merck Sharp & Dohme Corp.                                       | N Engl J Med                |
| 22355307 | Lataillade12     | CASTLE                     | 36   | NA | First-line ART: LPV/r + TDF + FTC vs. ATV/r + TDF + FTC                                 | Bristol-Myers Squibb                                            | PLoS ONE                    |
| 25256391 | Gupta14          | CASTLE                     | 204  | NA | Sequences before starting an initial ART                                                | Bristol-Myers Squibb                                            | Viruses                     |
| 29617822 | Wijting18        | DOMONO                     | 8    | NA | Simplification: DTG monotherapy                                                         | Erasmus Medical Center                                          | J. Infect. Dis              |
| 31740348 | Molina20         | DRIVE-FORWARD; DRIVE-AHEAD | 7    | NA | First-line ART: DOR-containing regimen (Primary resistance data from IAS 2018 by Lai M) | Merck Sharp & Dohme Corp                                        | Lancet HIV                  |
| 20854144 | Tambuyzer10      | Duet 1 & 2                 | 93   | NA | Salvage ART: ETR + DRV/r + NRTI                                                         | Tibotec Pharmaceuticals, Ireland                                | AIDS Res. Hum. Retroviruses |
| 23714781 | Rimsky13         | ECHO & THRIVE              | 128  | NA | First-line ART: RPV+ NRTIs vs. EFV + NRTIs (Sequences pre- and post-ART)                | Tibotec Pharmaceuticals, Ireland                                | Antivir. Ther. (Lond.)      |
| 22951490 | Vingerhoets13    | ECHO & THRIVE              | 1796 | NA | Sequences before starting an initial ART                                                | Tibotec Pharmaceuticals, Ireland                                | Antivir. Ther. (Lond.)      |
| 31279073 | Eron19           | EMERALD                    | 6    | NA | Simplification: DRV/cobi + TAF + FTC                                                    | Janssen R&D Ireland                                             | Antiviral Res               |
| 25926858 | Tashima14        | GS-216-0130                | 295  | NA | First-line ART: DRV/cobi + NRTIs (Sequences pre- and post-ART)                          | Gilead Sciences                                                 | AIDS Res Ther               |
| 25321623 | White15          | GS-236-0102                | 700  | NA | First-line ART: EVG/cobi + TDF + FTC vs. EFV + TDF + FTC (Sequences pre- and post-ART)  | Gilead Sciences                                                 | Antivir. Ther. (Lond.)      |

|          |                  |                             |      |    |                                                                                                                     |                                                                 |                             |
|----------|------------------|-----------------------------|------|----|---------------------------------------------------------------------------------------------------------------------|-----------------------------------------------------------------|-----------------------------|
| 25350960 | Kulkarni14       | GS-236-0103                 | 708  | NA | First-line ART: EVG/cobi + TDF + FTC vs. ATV/r + FTC + TDF (Sequences pre- and post-ART)                            | Gilead Sciences                                                 | HIV Clin Trials             |
| 25777187 | Porter15         | GS-264-0110                 | 33   | NA | First-line ART: RPV + TDF + FTC vs. EFV + TDF + FTC                                                                 | Gilead Sciences                                                 | HIV Clin Trials             |
| 29627709 | Margot12         | GS-292-0104;<br>GS-292-0111 | 1733 | NA | First-line ART: EVG/cobi + TAF + FTC vs. EVG/cobi + TDF + FTC (Sequences pre- and post-ART)                         | Gilead Sciences                                                 | J. Clin. Virol              |
| 25867913 | Mills15          | GS-299-0102                 | 153  | NA | First-line: single tablet DRV/co/FTC/TAF(D/C/F/TAF) vs. three tablets (D + C + F/TDF) (Sequences pre- and post-ART) | Gilead Sciences                                                 | J Acquir Immune Defic Syndr |
| 28867497 | Gallant17        | GS-380-1489                 | 5    | NA | First-line: BIC + TDF + FTC vs. DTG + ABC + 3TC                                                                     | Gilead Sciences                                                 | Lancet                      |
| 29925489 | Molina18         | GS-380-1844                 | 5    | NA | Simplification: Switching to BIC + TDF + FTC from DTG + ABC + 3TC                                                   | Gilead Sciences                                                 | Lancet HIV                  |
| 29925490 | Daar18           | GS-380-1878                 | 7    | NA | Simplification: Switching to BIC + TDF + FTC from PI/r-regimen                                                      | Gilead Sciences                                                 | Lancet HIV                  |
| 28867499 | Sax17            | GS-380-1490                 | 12   | NA | First-line: BIC + TDF + FTC vs. DTG + TDF + FTC                                                                     | Gilead Sciences                                                 | Lancet                      |
| 26244386 | Olson15          | IMPAACT P1032               | 50   | NA | PMTCT: AZT monotherapy                                                                                              | National Institute of Allergy and Infectious Diseases           | AIDS                        |
| 30951600 | Viani19          | IMPAACT P1093               | 6    | NA | Salvage ART: DTG + optimized background                                                                             | National Institute of Allergy and Infectious Diseases           | J Pediatric Infect Dis Soc  |
| 25585528 | Ruane15          | INROADS                     | 2    | NA | First-line and salvage: DRV/r + ETR                                                                                 | Tibotec, Inc                                                    | HIV Med                     |
| 24913409 | Torres-Cornejo15 | MonDAR                      | 42   | NA | Simplification: DRV/r monotherapy                                                                                   | Hospitales Universitarios Virgen del Rocío                      | HIV Med                     |
| 22380531 | Pulido12         | Monet                       | 54   | NA | Simplification: DRV/r monotherapy                                                                                   | Janssen-Cilag International NV                                  | AIDS Res. Hum. Retroviruses |
| 22396434 | Lambert-Niclot12 | Monoï                       | 9    | NA | Simplification: DRV/r monotherapy vs. DRVr + NRTIs                                                                  | French National Agency for Research on AIDS and Viral Hepatitis | J. Antimicrob. Chemother    |
| 21258105 | Moorthy11        | NEVEREST                    | 124  | NA | Induction: LPV/r + d4T + 3TC -> NVP + d4T + 3TC vs. LPV/r + d4T + 3TC in infants with history of single-dose NVP    | Columbia University                                             | Clin. Infect. Dis           |

|          |                 |                |      |    |                                                                                               |                                                               |                                |
|----------|-----------------|----------------|------|----|-----------------------------------------------------------------------------------------------|---------------------------------------------------------------|--------------------------------|
| 23558157 | Lathouwers13    | ODIN           | 102  | NA | Salvage ART: DRV/r + optimized background                                                     | Tibotec Pharmaceuticals, Ireland                              | Antivir. Ther. (Lond.)         |
| 26566161 | Tambuyzer16     | PIANO          | 41   | NA | Salvage ART: ETR + optimized background in ART-experienced children                           | Tibotec Pharmaceuticals, Ireland                              | Antivir. Ther. (Lond.)         |
| 29428459 | Dunn18          | PIVOT          | 3    | NA | Simplification: PI/r monotherapy                                                              | Medical Research Council                                      | J. Clin. Virol                 |
| 27279571 | Girard17        | PROTEA         | 3    | NA | Simplification: DRV/r monotherapy vs. DRV/r + NRTIs                                           | Janssen-Cilag International NV                                | HIV Med                        |
| 30513108 | Kityo18         | REALITY        | 120  | NA | Intensification: RAL added to first-line ART                                                  | Anna Griffiths, MRC                                           | PLoS Med                       |
| 23830355 | Cahn13          | Sailing        | 19   | NA | Salvage ART: DTG + optimized background                                                       | ViiV Healthcare                                               | Lancet                         |
| 26424460 | Boyd15          | Second-Line    | 129  | NA | Second-line ART: LPV/r + RAL vs. LPV/r + NRTIs                                                | Kirby Institute                                               | Lancet HIV                     |
| 24964358 | Blanco15        | SPIRAL         | 74   | NA | Sequences before starting LPV/r + NRTIs                                                       | Hospital Clinic of Barcelona                                  | Antivir. Ther. (Lond.)         |
| 24074642 | Raffi13         | SPRING-2       | 30   | NA | First-line ART: DTG + NRTIs vs. RAL + NRTIs (Sequences pre- and post-ART)                     | ViiV Healthcare                                               | Lancet Infect Dis              |
| 25711326 | Baxter15        | START          | 1946 | NA | Sequences before starting an initial ART                                                      | University of Minnesota                                       | HIV Med                        |
| 24908550 | Pozniak14       | STRATEGY-NNRTI | 2    | NA | Simplification: Switch to EVG/cobi + TDF + FTC from first-line EFV + TDF + FTC vs. non-switch | Gilead Sciences                                               | Lancet Infect Dis              |
| 27355415 | Prasitsuebsai16 | TASER-P        | 48   | NA | Second-line ART                                                                               | The HIV Netherlands Australia Thailand Research Collaboration | J. Acquir. Immune Defic. Syndr |
| 23225901 | Eron13          | VIKING         | 9    | NA | Salvage ART: DTG + optimized background                                                       | ViiV Healthcare                                               | J. Infect. Dis                 |
| 26866979 | Naeger16        | VIKING-4       | 6    | NA | Salvage ART: DTG + optimized background                                                       | ViiV Healthcare                                               | Antivir. Ther. (Lond.)         |
| 28891788 | Kulkarni17      | WAVES          | 575  | NA | First-line ART: EVG/cobi + TDF + FTC vs. ATV/r + TDF + FTC (Sequences pre- and post-ART)      | Gilead Sciences                                               | HIV Clin Trials                |
